# Supplementary material for: Checklist of British and Irish Hymenoptera - Proctotrupoidea
Source: Biodivers Data J. 2016 Apr 15;(4):e7936. doi: 10.3897/BDJ.4.e7936 (PMC4867700; doi:10.3897/BDJ.4.e7936)
Supplement: Supplementary material 2 — Checklist of British and Irish Proctotrupoidea [file biodiversity_data_journal-4-e7936-s002.xlsx]

## Sheet: TAXA
group	seq	ID	usage	rank	ori name	Superfamily	Family	Subfamily	Tribe	Genus	Subgenus	species	authorship	NOTES	Distribution	original genus	original sp spell
procto	1	procto1	valid	Superfamily	Proctotrupoidea	PROCTOTRUPOIDEA								Recent phylogenetic studies suggest that the Proctotrupoidea should be broken up as it is not a monophyletic taxon (e.g. Rasnitsyn, 1988; Ronquist et al., 1999; Dowton & Austin, 2001). The Proctotrupoidea as presently defined (e.g. Sharkey, 2007) now comprises the Heloridae and Proctotrupidae and the extralimital families Austroniidae, Pelecinidae, Peradeniidae, Proctorenyxidae, Roproniidae and V…
procto	7	procto7	valid	Family	Heloridae Förster, 1856	PROCTOTRUPOIDEA	Heloridae						Förster, 1856	Distribution data from Townes (1977), Fergusson & Smith (1974), Cooter & Fergusson (1993) and O’Connor et al. (2004).
procto	9	procto9	valid	genus	Helorus Latreille, 1802	PROCTOTRUPOIDEA	Heloridae			Helorus			Latreille, 1802
procto	10	procto10	invalid	genus	COPELUS Provancher, 1881	PROCTOTRUPOIDEA	Heloridae			COPELUS			Provancher, 1881
procto	11	procto11	valid	species	anomalipes (Panzer, 1798, Sphex)	PROCTOTRUPOIDEA	Heloridae			Helorus		anomalipes	(Panzer, 1798)		England, Ireland	Sphex
procto	12	procto12	invalid	species	ater Latreille, 1802	PROCTOTRUPOIDEA	Heloridae			Helorus		ater	Latreille, 1802
procto	13	procto13	invalid	species	paradoxus (Provancher, 1881, Copelus)	PROCTOTRUPOIDEA	Heloridae			Helorus		paradoxus	(Provancher, 1881, Copelus)
procto	14	procto14	invalid	species	?bifoveolata Gregor, 1938	PROCTOTRUPOIDEA	Heloridae			Helorus		?bifoveolata	Gregor, 1938
procto	15	procto15	invalid	species	?nigrotibia Hellén, 1941	PROCTOTRUPOIDEA	Heloridae			Helorus		?nigrotibia	Hellén, 1941
procto	16	procto16	valid	species	nigripes Förster, 1856	PROCTOTRUPOIDEA	Heloridae			Helorus		nigripes	Förster, 1856		England
procto	17	procto17	invalid	species	rugosus Thomson, 1858	PROCTOTRUPOIDEA	Heloridae			Helorus		rugosus	Thomson, 1858
procto	18	procto18	valid	species	ruficornis Förster, 1856	PROCTOTRUPOIDEA	Heloridae			Helorus		ruficornis	Förster, 1856		England, Ireland
procto	19	procto19	invalid	species	coruscus Haliday, 1857	PROCTOTRUPOIDEA	Heloridae			Helorus		coruscus	Haliday, 1857
procto	20	procto20	invalid	species	corruscus misspelling	PROCTOTRUPOIDEA	Heloridae			Helorus		corruscus	misspelling
procto	21	procto21	invalid	species	flavipes Kieffer, 1907	PROCTOTRUPOIDEA	Heloridae			Helorus		flavipes	Kieffer, 1907
procto	23	procto23	valid	Family	Proctotrupidae Latreille, 1802	PROCTOTRUPOIDEA	Proctotrupidae						Latreille, 1802	Distribution data from Townes & Townes (1981) and O’Connor et al. (2004).
procto	25	procto25	valid	genus	Brachyserphus Hellén, 1941	PROCTOTRUPOIDEA	Proctotrupidae			Brachyserphus			Hellén, 1941
procto	26	procto26	valid	species	parvulus (Nees, 1834, Codrus)	PROCTOTRUPOIDEA	Proctotrupidae			Brachyserphus		parvulus	(Nees, 1834)		England, Ireland	Codrus
procto	28	procto28	valid	genus	Codrus Panzer, 1801	PROCTOTRUPOIDEA	Proctotrupidae			Codrus			Panzer, 1801
procto	29	procto29	valid	species	niger Panzer, 1805	PROCTOTRUPOIDEA	Proctotrupidae			Codrus		niger	Panzer, 1805		England, Ireland
procto	30	procto30	valid	species	picicornis (Förster, 1856, Disogmus)	PROCTOTRUPOIDEA	Proctotrupidae			Codrus		picicornis	(Förster, 1856)	Listed as Phaenoserphus subcompressus in Fergusson (1978).	England, Ireland	Disogmus
procto	31	procto31	invalid	species	subcompressus (Hedicke, 1927, Phaenoserphus)	PROCTOTRUPOIDEA	Proctotrupidae			Codrus		subcompressus	(Hedicke, 1927, Phaenoserphus)
procto	32	procto32	invalid	species	vexator (Nixon, 1938, Phaenoserphus)	PROCTOTRUPOIDEA	Proctotrupidae			Codrus		vexator	(Nixon, 1938, Phaenoserphus)
procto	33	procto33	invalid	species	subclavatus (Hellén, 1941, Phaenoserphus)	PROCTOTRUPOIDEA	Proctotrupidae			Codrus		subclavatus	(Hellén, 1941, Phaenoserphus)
procto	35	procto35	valid	genus	Cryptoserphus Kieffer, 1907	PROCTOTRUPOIDEA	Proctotrupidae			Cryptoserphus			Kieffer, 1907
procto	36	procto36	valid	species	aculeator (Haliday, 1839, Proctotrupes)	PROCTOTRUPOIDEA	Proctotrupidae			Cryptoserphus		aculeator	(Haliday, 1839)		England, Scotland, Ireland	Proctotrupes
procto	37	procto37	invalid	species	ater (Nees, 1834, Codrus) preocc.	PROCTOTRUPOIDEA	Proctotrupidae			Cryptoserphus		ater	(Nees, 1834, Codrus) preocc.
procto	38	procto38	invalid	species	perrisi (Kieffer, 1908, Seprhus)	PROCTOTRUPOIDEA	Proctotrupidae			Cryptoserphus		perrisi	(Kieffer, 1908, Seprhus)
procto	39	procto39	invalid	species	deshii Drake, 1970, Cryptoserphus	PROCTOTRUPOIDEA	Proctotrupidae			Cryptoserphus		deshii	Drake, 1970, Cryptoserphus
procto	40	procto40	valid	species	dilatus Townes, 1981 I	PROCTOTRUPOIDEA	Proctotrupidae			Cryptoserphus		dilatus	Townes, 1981	added by Townes & Townes (1981)	Ireland
procto	41	procto41	valid	species	flavipes (Provancher, 1881, Proctotrupes)	PROCTOTRUPOIDEA	Proctotrupidae			Cryptoserphus		flavipes	(Provancher, 1881)		Ireland	Proctotrupes
procto	42	procto42	invalid	species	brevimanus (Kieffer, 1908, Serphus)	PROCTOTRUPOIDEA	Proctotrupidae			Cryptoserphus		brevimanus	(Kieffer, 1908, Serphus)
procto	43	procto43	invalid	species	longicalcar (Kieffer, 1908, Serphus)	PROCTOTRUPOIDEA	Proctotrupidae			Cryptoserphus		longicalcar	(Kieffer, 1908, Serphus)
procto	44	procto44	invalid	species	cumaeus Nixon, 1938	PROCTOTRUPOIDEA	Proctotrupidae			Cryptoserphus		cumaeus	Nixon, 1938
procto	45	procto45	invalid	species	fungorum Szelényi, 1940	PROCTOTRUPOIDEA	Proctotrupidae			Cryptoserphus		fungorum	Szelényi, 1940
procto	46	procto46	valid	species	longitarsis (Thomson, 1858, Proctotrupes)	PROCTOTRUPOIDEA	Proctotrupidae			Cryptoserphus		longitarsis	(Thomson, 1858)		Ireland	Proctotrupes
procto	48	procto48	valid	genus	Disogmus Förster, 1856	PROCTOTRUPOIDEA	Proctotrupidae			Disogmus			Förster, 1856
procto	49	procto49	valid	species	areolator (Haliday, 1839, Proctotrupes)	PROCTOTRUPOIDEA	Proctotrupidae			Disogmus		areolator	(Haliday, 1839)		England, Scotland, Ireland	Proctotrupes
procto	50	procto50	invalid	species	aequator Förster, 1856	PROCTOTRUPOIDEA	Proctotrupidae			Disogmus		aequator	Förster, 1856
procto	51	procto51	invalid	species	discrepator Förster, 1856	PROCTOTRUPOIDEA	Proctotrupidae			Disogmus		discrepator	Förster, 1856
procto	52	procto52	invalid	species	elegans (Thomson, 1858, Proctotrupes)	PROCTOTRUPOIDEA	Proctotrupidae			Disogmus		elegans	(Thomson, 1858, Proctotrupes)
procto	53	procto53	invalid	species	nigripennis (Thomson, 1858, Proctotrupes)	PROCTOTRUPOIDEA	Proctotrupidae			Disogmus		nigripennis	(Thomson, 1858, Proctotrupes)
procto	54	procto54	invalid	species	canadensis Harrington, 1900	PROCTOTRUPOIDEA	Proctotrupidae			Disogmus		canadensis	Harrington, 1900
procto	55	procto55	invalid	species	diversicornis Kieffer, 1906	PROCTOTRUPOIDEA	Proctotrupidae			Disogmus		diversicornis	Kieffer, 1906
procto	56	procto56	invalid	species	glabratus Kieffer, 1906	PROCTOTRUPOIDEA	Proctotrupidae			Disogmus		glabratus	Kieffer, 1906
procto	57	procto57	invalid	species	carinatus Kieffer, 1907	PROCTOTRUPOIDEA	Proctotrupidae			Disogmus		carinatus	Kieffer, 1907
procto	58	procto58	invalid	species	torvus Whittaker, 1930	PROCTOTRUPOIDEA	Proctotrupidae			Disogmus		torvus	Whittaker, 1930
procto	59	procto59	valid	species	basalis (Thomson, 1858, Proctotrupes)	PROCTOTRUPOIDEA	Proctotrupidae			Disogmus		basalis	(Thomson, 1858)		England, Scotland, Ireland	Proctotrupes
procto	60	procto60	invalid	species	fuscitarsis Kieffer, 1907	PROCTOTRUPOIDEA	Proctotrupidae			Disogmus		fuscitarsis	Kieffer, 1907
procto	62	procto62	valid	genus	exallonyx Kieffer, 1904	PROCTOTRUPOIDEA	Proctotrupidae			Exallonyx			Kieffer, 1904	Unplaced species of <i>Exallonyx</i>: [<i>leviventris</i> Kieffer, 1908 nom. dub. - England]
procto	63	procto63	valid	subgenus	exallonyx Kieffer, 1904	PROCTOTRUPOIDEA	Proctotrupidae			Exallonyx	Exallonyx		Kieffer, 1904
procto	64	procto64	valid	species	ater (Gravenhorst, 1807, Codrus)	PROCTOTRUPOIDEA	Proctotrupidae			Exallonyx	Exallonyx	ater	(Gravenhorst, 1807)		England, Ireland	Codrus
procto	65	procto65	invalid	species	aterrimus (Dalla Torre, 1898, Proctotrypes)	PROCTOTRUPOIDEA	Proctotrupidae			Exallonyx	Exallonyx	aterrimus	(Dalla Torre, 1898, Proctotrypes)
procto	66	procto66	invalid	species	xanthocerus Kieffer, 1908	PROCTOTRUPOIDEA	Proctotrupidae			Exallonyx	Exallonyx	xanthocerus	Kieffer, 1908
procto	67	procto67	invalid	species	filicornis Kieffer, 1908	PROCTOTRUPOIDEA	Proctotrupidae			Exallonyx	Exallonyx	filicornis	Kieffer, 1908
procto	68	procto68	invalid	species	syriacus Kieffer, 1908	PROCTOTRUPOIDEA	Proctotrupidae			Exallonyx	Exallonyx	syriacus	Kieffer, 1908
procto	69	procto69	invalid	species	gracilis Nixon, 1938	PROCTOTRUPOIDEA	Proctotrupidae			Exallonyx	Exallonyx	gracilis	Nixon, 1938
procto	70	procto70	valid	species	brevimala Townes, 1981	PROCTOTRUPOIDEA	Proctotrupidae			Exallonyx	Exallonyx	brevimala	Townes, 1981	added by Townes & Townes (1981)	England, Ireland
procto	71	procto71	valid	species	confusus Nixon, 1938	PROCTOTRUPOIDEA	Proctotrupidae			Exallonyx	Exallonyx	confusus	Nixon, 1938		England, Ireland
procto	72	procto72	valid	species	crenicornis (Nees 1834, Codrus)	PROCTOTRUPOIDEA	Proctotrupidae			Exallonyx	Exallonyx	crenicornis	(Nees, 1834)	Listed, as Codrus fumipennis (Kieffer), as doubtfully British by Fergusson (1978); status as a British species confirmed by Townes & Townes (1981).	England, Scotland	Codrus
procto	73	procto73	invalid	species	clavipes (Thomson, 1858, Proctotrupes)	PROCTOTRUPOIDEA	Proctotrupidae			Exallonyx	Exallonyx	clavipes	(Thomson, 1858, Proctotrupes)
procto	74	procto74	invalid	species	donisthorpei Kieffer, 1908	PROCTOTRUPOIDEA	Proctotrupidae			Exallonyx	Exallonyx	donisthorpei	Kieffer, 1908
procto	75	procto75	invalid	species	fumipennis Kieffer, 1908	PROCTOTRUPOIDEA	Proctotrupidae			Exallonyx	Exallonyx	fumipennis	Kieffer, 1908
procto	76	procto76	valid	species	formicarius Kieffer, 1904	PROCTOTRUPOIDEA	Proctotrupidae			Exallonyx	Exallonyx	formicarius	Kieffer, 1904		England, Scotland, Ireland
procto	77	procto77	valid	species	ligatus (Nees, 1834, Codrus)	PROCTOTRUPOIDEA	Proctotrupidae			Exallonyx	Exallonyx	ligatus	(Nees, 1834)		England, Ireland	Codrus
procto	78	procto78	valid	species	longicornis (Nees, 1834, Codrus)	PROCTOTRUPOIDEA	Proctotrupidae			Exallonyx	Exallonyx	longicornis	(Nees, 1834)		Scotland, Ireland	Codrus
procto	79	procto79	invalid	species	micrurus (Keiffer, 1908, Serphus)	PROCTOTRUPOIDEA	Proctotrupidae			Exallonyx	Exallonyx	micrurus	(Keiffer, 1908, Serphus)
procto	80	procto80	valid	species	microcerus Kieffer, 1908	PROCTOTRUPOIDEA	Proctotrupidae			Exallonyx	Exallonyx	microcerus	Kieffer, 1908	Listed as a synonym of formicarius in Fergusson (1978).	England, Ireland
procto	81	procto81	invalid	species	hyalinipennis Kieffer, 1908	PROCTOTRUPOIDEA	Proctotrupidae			Exallonyx	Exallonyx	hyalinipennis	Kieffer, 1908
procto	82	procto82	valid	species	minor Townes, 1981	PROCTOTRUPOIDEA	Proctotrupidae			Exallonyx	Exallonyx	minor	Townes, 1981		England, Scotland, Ireland
procto	83	procto83	valid	species	nixoni Townes, 1981	PROCTOTRUPOIDEA	Proctotrupidae			Exallonyx	Exallonyx	nixoni	Townes, 1981		England
procto	84	procto84	valid	species	pallidistigma Morley, 1922	PROCTOTRUPOIDEA	Proctotrupidae			Exallonyx	Exallonyx	pallidistigma	Morley, 1922		England, Ireland
procto	85	procto85	invalid	species	niger misident.	PROCTOTRUPOIDEA	Proctotrupidae			Exallonyx	Exallonyx	niger	misident.
procto	86	procto86	invalid	species	milleri (Tomšík, 1942, Phaenoserphus)	PROCTOTRUPOIDEA	Proctotrupidae			Exallonyx	Exallonyx	milleri	(Tomšík, 1942, Phaenoserphus)
procto	87	procto87	valid	species	quadriceps (Ashmead, 1893, Proctotrypes)	PROCTOTRUPOIDEA	Proctotrupidae			Exallonyx	Exallonyx	quadriceps	(Ashmead, 1893)	Recorded by Townes & Townes (1981).	England, Scotland, Ireland	Proctotrypes
procto	88	procto88	invalid	species	crassicornis Kieffer, 1908	PROCTOTRUPOIDEA	Proctotrupidae			Exallonyx	Exallonyx	crassicornis	Kieffer, 1908	Listed as a queried synonym of ater in Fergusson (1978).
procto	89	procto89	invalid	species	hyalinipennis (Morley, 1922, Proctotrypes)	PROCTOTRUPOIDEA	Proctotrupidae			Exallonyx	Exallonyx	hyalinipennis	(Morley, 1922, Proctotrypes)	Listed as a synonym of ligatus in Fergusson (1978).
procto	90	procto90	valid	species	subserratus Kieffer, 1908	PROCTOTRUPOIDEA	Proctotrupidae			Exallonyx	Exallonyx	subserratus	Kieffer, 1908		England, Ireland
procto	91	procto91	invalid	species	curtigena Nixon, 1938	PROCTOTRUPOIDEA	Proctotrupidae			Exallonyx	Exallonyx	curtigena	Nixon, 1938
procto	92	procto92	valid	species	trichomus Townes, 1981	PROCTOTRUPOIDEA	Proctotrupidae			Exallonyx	Exallonyx	trichomus	Townes, 1981	added by Townes & Townes (1981)	England, Ireland
procto	93	procto93	valid	species	trifoveatus Kieffer, 1908	PROCTOTRUPOIDEA	Proctotrupidae			Exallonyx	Exallonyx	trifoveatus	Kieffer, 1908	added by Townes & Townes (1981)	England, Ireland
procto	94	procto94	invalid	species	talpae Kieffer, 1908	PROCTOTRUPOIDEA	Proctotrupidae			Exallonyx	Exallonyx	talpae	Kieffer, 1908
procto	95	procto95	invalid	species	borneanus (Cameron, 1912, Proctotrypes)	PROCTOTRUPOIDEA	Proctotrupidae			Exallonyx	Exallonyx	borneanus	(Cameron, 1912, Proctotrypes)
procto	96	procto96	invalid	species	reicherti (Enderlein, 1916, Proctotrupes)	PROCTOTRUPOIDEA	Proctotrupidae			Exallonyx	Exallonyx	reicherti	(Enderlein, 1916, Proctotrupes)
procto	97	procto97	invalid	species	parvulus Brues, 1919	PROCTOTRUPOIDEA	Proctotrupidae			Exallonyx	Exallonyx	parvulus	Brues, 1919
procto	98	procto98	invalid	species	philonthiphagus Williams, 1932	PROCTOTRUPOIDEA	Proctotrupidae			Exallonyx	Exallonyx	philonthiphagus	Williams, 1932
procto	99	procto99	valid	species	wasmanni Kieffer, 1904	PROCTOTRUPOIDEA	Proctotrupidae			Exallonyx	Exallonyx	wasmanni	Kieffer, 1904	Although excluded from the Irish list by O’Connor et al. (2004), the locality ‘Tanrego’ quoted by Townes & Townes (1981) refers to an estate in Sligo.	England, Ireland
procto	100	procto100	invalid	species	myrmecophilus Kieffer, 1904	PROCTOTRUPOIDEA	Proctotrupidae			Exallonyx	Exallonyx	myrmecophilus	Kieffer, 1904
procto	101	procto101	invalid	species	socialis Kieffer, 1908	PROCTOTRUPOIDEA	Proctotrupidae			Exallonyx	Exallonyx	socialis	Kieffer, 1908
procto	103	procto103	valid	subgenus	EOCODRUS Pschorn-Walcher, 1958	PROCTOTRUPOIDEA	Proctotrupidae			Exallonyx	Eocodrus		Pschorn-Walcher, 1958
procto	104	procto104	valid	species	brevicornis (Haliday, 1839, Proctotrupes)	PROCTOTRUPOIDEA	Proctotrupidae			Exallonyx	Eocodrus	brevicornis	(Haliday, 1839)		England, Scotland, Ireland	Proctotrupes
procto	105	procto105	invalid	species	lineata Kieffer, 1908	PROCTOTRUPOIDEA	Proctotrupidae			Exallonyx	Eocodrus	lineata	Kieffer, 1908
procto	110	procto110	valid	genus	mischoserphus Townes, 1981	PROCTOTRUPOIDEA	Proctotrupidae			Mischoserphus			Townes, 1981
procto	111	procto111	valid	species	arcuator (Stelfox, 1950, Cryptoserphus)	PROCTOTRUPOIDEA	Proctotrupidae			Mischoserphus		arcuator	(Stelfox, 1950)		Ireland	Cryptoserphus
procto	112	procto112	invalid	species	ione (Kozlov, 1971, Cryptoserphus)	PROCTOTRUPOIDEA	Proctotrupidae			Mischoserphus		ione	(Kozlov, 1971, Cryptoserphus)
procto	114	procto114	valid	genus	Paracodrus Kieffer, 1907	PROCTOTRUPOIDEA	Proctotrupidae			Paracodrus			Kieffer, 1907
procto	115	procto115	valid	species	apterogynus (Haliday, 1839, Proctotrupes)	PROCTOTRUPOIDEA	Proctotrupidae			Paracodrus		apterogynus	(Haliday, 1839)		Ireland	Proctotrupes
procto	116	procto116	invalid	species	albipennis (Thomson, 1858, Codrus)	PROCTOTRUPOIDEA	Proctotrupidae			Paracodrus		albipennis	(Thomson, 1858, Codrus)
procto	117	procto117	invalid	species	bethyliformis Kieffer, 1907	PROCTOTRUPOIDEA	Proctotrupidae			Paracodrus		bethyliformis	Kieffer, 1907
procto	119	procto119	valid	genus	Parthenocodrus Pschorn-Walcher, 1958	PROCTOTRUPOIDEA	Proctotrupidae			Parthenocodrus			Pschorn-Walcher, 1958
procto	120	procto120	invalid	species	CRYPTOCODRUS Pschorn-Walcher, 1958	PROCTOTRUPOIDEA	Proctotrupidae			Parthenocodrus		CRYPTOCODRUS	Pschorn-Walcher, 1958
procto	121	procto121	valid	species	elongatus (Haliday, 1839, Proctotrupes)	PROCTOTRUPOIDEA	Proctotrupidae			Parthenocodrus		elongatus	(Haliday, 1839)		England, Ireland	Proctotrupes
procto	122	procto122	invalid	species	buccatus (Thomson, 1858, Proctotrupes)	PROCTOTRUPOIDEA	Proctotrupidae			Parthenocodrus		buccatus	(Thomson, 1858, Proctotrupes)
procto	124	procto124	valid	genus	Phaenoserphus Kieffer, 1908	PROCTOTRUPOIDEA	Proctotrupidae			Phaenoserphus			Kieffer, 1908
procto	125	procto125	invalid	species	CARABIPHAGUS Morley, 1931	PROCTOTRUPOIDEA	Proctotrupidae			Phaenoserphus		CARABIPHAGUS	Morley, 1931
procto	126	procto126	valid	species	chittii (Morley, 1922, Proctotrypes)	PROCTOTRUPOIDEA	Proctotrupidae			Phaenoserphus		chittii	(Morley, 1922)		England, Ireland	Proctotrypes
procto	127	procto127	invalid	species	dubiosus Nixon, 1938	PROCTOTRUPOIDEA	Proctotrupidae			Phaenoserphus		dubiosus	Nixon, 1938
procto	128	procto128	valid	species	fuscipes (Haliday, 1839, Proctotrupes)	PROCTOTRUPOIDEA	Proctotrupidae			Phaenoserphus		fuscipes	(Haliday, 1839)		Scotland, Ireland	Proctotrupes
procto	129	procto129	valid	species	gregori Tomšík, 1942	PROCTOTRUPOIDEA	Proctotrupidae			Phaenoserphus		gregori	Tomšík, 1942		Ireland
procto	130	procto130	valid	species	pallipes (Jurine, 1807, Codrus)	PROCTOTRUPOIDEA	Proctotrupidae			Phaenoserphus		pallipes	(Jurine, 1807)		England, Ireland	Codrus
procto	131	procto131	invalid	species	rufipes (Brullé, 1846, Proctotrupes)	PROCTOTRUPOIDEA	Proctotrupidae			Phaenoserphus		rufipes	(Brullé, 1846, Proctotrupes)
procto	132	procto132	invalid	species	testaceicornis (Kieffer, 1908, Serphus)	PROCTOTRUPOIDEA	Proctotrupidae			Phaenoserphus		testaceicornis	(Kieffer, 1908, Serphus)
procto	133	procto133	valid	species	viator (Haliday, 1839, Proctotrupes)	PROCTOTRUPOIDEA	Proctotrupidae			Phaenoserphus		viator	(Haliday, 1839)		England, Ireland	Proctotrupes
procto	134	procto134	invalid	species	curtipennis (Haliday, 1839, Proctotrupes)	PROCTOTRUPOIDEA	Proctotrupidae			Phaenoserphus		curtipennis	(Haliday, 1839, Proctotrupes)
procto	135	procto135	invalid	species	laevifrons (Förster, 1861, Proctotrupes)	PROCTOTRUPOIDEA	Proctotrupidae			Phaenoserphus		laevifrons	(Förster, 1861, Proctotrupes)
procto	136	procto136	invalid	species	sixianus (Vollenhoven, 1879, Proctotrypes)	PROCTOTRUPOIDEA	Proctotrupidae			Phaenoserphus		sixianus	(Vollenhoven, 1879, Proctotrypes)
procto	138	procto138	valid	genus	PHANEROSERPHUS Pschorn-Walcher, 1958	PROCTOTRUPOIDEA	Proctotrupidae			Phaneroserphus			Pschorn-Walcher, 1958	Species of <i>Phaneroserphus</i> removed from the British and Irish list: [<i>cristatus</i> Townes, 1981]: Fauna Europaea lists Phaneroserphus cristatus as occurring in Britain and France but Townes & Townes (1981) state that this species is only found in Japan, and no literature citations for its European occurrence can be traced.
procto	139	procto139	valid	species	calcar (Haliday, 1839, Proctotrupes)	PROCTOTRUPOIDEA	Proctotrupidae			Phaneroserphus		calcar	(Haliday, 1839)		England, Scotland, Ireland	Proctotrupes
procto	140	procto140	invalid	species	calcaratus (Thomson, 1858, Proctotrupes)	PROCTOTRUPOIDEA	Proctotrupidae			Phaneroserphus		calcaratus	(Thomson, 1858, Proctotrupes)
procto	141	procto141	invalid	species	seticornis (Thomson, 1858, Proctotrupes)	PROCTOTRUPOIDEA	Proctotrupidae			Phaneroserphus		seticornis	(Thomson, 1858, Proctotrupes)
procto	142	procto142	invalid	species	areolatus (Kieffer, 1908, Serphus)	PROCTOTRUPOIDEA	Proctotrupidae			Phaneroserphus		areolatus	(Kieffer, 1908, Serphus)
procto	143	procto143	invalid	species	castaneus (Kieffer, 1908, Serphus)	PROCTOTRUPOIDEA	Proctotrupidae			Phaneroserphus		castaneus	(Kieffer, 1908, Serphus)
procto	146	procto146	valid	genus	Proctotrupes Latreille, 1796	PROCTOTRUPOIDEA	Proctotrupidae			Proctotrupes			Latreille, 1796
procto	147	procto147	invalid	genus	SERPHUS Schrank, 1780 suppressed	PROCTOTRUPOIDEA	Proctotrupidae			SERPHUS			Schrank, 1780
procto	148	procto148	invalid	genus	ERODORUS Walckanaer, 1802	PROCTOTRUPOIDEA	Proctotrupidae			ERODORUS			Walckanaer, 1802
procto	149	procto149	invalid	genus	PROCTRUPES Rafinesque, 1815	PROCTOTRUPOIDEA	Proctotrupidae			PROCTRUPES			Rafinesque, 1815
procto	150	procto150	invalid	genus	PROCTOTRYPES Aggasiz, 1846	PROCTOTRUPOIDEA	Proctotrupidae			PROCTOTRYPES			Aggasiz, 1846
procto	151	procto151	invalid	genus	PROCTOTROPIS Gistel, 1848	PROCTOTRUPOIDEA	Proctotrupidae			PROCTOTROPIS			Gistel, 1848
procto	152	procto152	valid	species	brachypterus (Schrank, 1780, Serphus)	PROCTOTRUPOIDEA	Proctotrupidae			Proctotrupes		brachypterus	(Schrank, 1780)		England, Ireland	Serphus
procto	153	procto153	invalid	species	divagator (Olivier, 1792, Ichneumon)	PROCTOTRUPOIDEA	Proctotrupidae			Proctotrupes		divagator	(Olivier, 1792, Ichneumon)
procto	154	procto154	invalid	species	campanulator (Fabricius, 1798, Ichneumon)	PROCTOTRUPOIDEA	Proctotrupidae			Proctotrupes		campanulator	(Fabricius, 1798, Ichneumon)
procto	155	procto155	invalid	species	emarciator (Fabricius, 1798, Ichneumon)	PROCTOTRUPOIDEA	Proctotrupidae			Proctotrupes		emarciator	(Fabricius, 1798, Ichneumon)
procto	156	procto156	invalid	species	bimaculatus (Walckenaer, 1802, Erodorus)	PROCTOTRUPOIDEA	Proctotrupidae			Proctotrupes		bimaculatus	(Walckenaer, 1802, Erodorus)
procto	157	procto157	invalid	species	brevipennis Latreille, 1802	PROCTOTRUPOIDEA	Proctotrupidae			Proctotrupes		brevipennis	Latreille, 1802
procto	158	procto158	invalid	species	bicolor Haliday, 1839	PROCTOTRUPOIDEA	Proctotrupidae			Proctotrupes		bicolor	Haliday, 1839
procto	159	procto159	invalid	species	gladiator Haliday, 1839	PROCTOTRUPOIDEA	Proctotrupidae			Proctotrupes		gladiator	Haliday, 1839
procto	160	procto160	invalid	species	sulcatus (Kieffer, 1908, Serphus)	PROCTOTRUPOIDEA	Proctotrupidae			Proctotrupes		sulcatus	(Kieffer, 1908, Serphus)
procto	161	procto161	invalid	species	hofferi (Tomšík, 1944, Serphus)	PROCTOTRUPOIDEA	Proctotrupidae			Proctotrupes		hofferi	(Tomšík, 1944, Serphus)
procto	162	procto162	invalid	species	azarbajdzhanicus (Samedov, 1954, Serphus)	PROCTOTRUPOIDEA	Proctotrupidae			Proctotrupes		azarbajdzhanicus	(Samedov, 1954, Serphus)
procto	163	procto163	valid	species	gravidator (Linnaeus, 1758, Ichneumon)	PROCTOTRUPOIDEA	Proctotrupidae			Proctotrupes		gravidator	(Linnaeus, 1758)	Proctotrupes indivisus (Kieffer, 1908, Serphus) removed from synonymy by Notton (2007).	England, Ireland	Ichneumon
procto	164	procto164	invalid	species	meridionalis Gribodo, 1880	PROCTOTRUPOIDEA	Proctotrupidae			Proctotrupes		meridionalis	Gribodo, 1880
procto	165	procto165	invalid	species	rufigaster Provancher, 1881	PROCTOTRUPOIDEA	Proctotrupidae			Proctotrupes		rufigaster	Provancher, 1881
procto	166	procto166	invalid	species	collaris Szépligeti, 1901	PROCTOTRUPOIDEA	Proctotrupidae			Proctotrupes		collaris	Szépligeti, 1901
procto	167	procto167	invalid	species	suzukii Matsumura, 1912	PROCTOTRUPOIDEA	Proctotrupidae			Proctotrupes		suzukii	Matsumura, 1912
procto	168	procto168	invalid	species	zabriskiei (Brues, 1919, Serphus)	PROCTOTRUPOIDEA	Proctotrupidae			Proctotrupes		zabriskiei	(Brues, 1919, Serphus)
procto	170	procto170	valid	genus	TRETOSERPHUS Townes, 1981	PROCTOTRUPOIDEA	Proctotrupidae			Tretoserphus			Townes, 1981	species of <i>Tretoserphus</i> removed from the British and Irish list: [<i>foveolatus</i> (Möller, 1882, <i>Proctotrupes</i>)]: Listed as British by Fergusson (1978) as <i>perkinsi</i> was then considered to be a junior synonym of <i>foveolatus</i>.
procto	171	procto171	valid	species	laricis (Haliday, 1839, Proctotrupes)	PROCTOTRUPOIDEA	Proctotrupidae			Tretoserphus		laricis	(Haliday, 1839)		England, Ireland	Proctotrupes
procto	172	procto172	invalid	species	nigricauda (Kieffer, 1908, Serphus)	PROCTOTRUPOIDEA	Proctotrupidae			Tretoserphus		nigricauda	(Kieffer, 1908, Serphus)
procto	173	procto173	invalid	species	melanderi (Brues, 1919, Cryptoserphus)	PROCTOTRUPOIDEA	Proctotrupidae			Tretoserphus		melanderi	(Brues, 1919, Cryptoserphus)
procto	174	procto174	valid	species	perkinsi (Nixon, 1942, Cryptoserphus)	PROCTOTRUPOIDEA	Proctotrupidae			Tretoserphus		perkinsi	(Nixon, 1942)		England, Ireland	Cryptoserphus

## Sheet: original names
group	ori seq	ID	author	date	original species	current authorship	original genus	original species	original combination	original authorship
Acu	1008	Acu1008	Kirby	1802	minutula	(Kirby, 1802)	Melitta	minutula	Melitta minutula	Kirby, 1802
Acu	1013	Acu1013	Kirby	1802	nana	(Kirby, 1802)	Melitta	nana	Melitta nana	Kirby, 1802
Acu	1023	Acu1023	Kirby	1802	chrysosceles	(Kirby, 1802)	Melitta	chrysosceles	Melitta chrysosceles	Kirby, 1802
Acu	1029	Acu1029	Kirby	1802	coitana	(Kirby, 1802)	Melitta	coitana	Melitta coitana	Kirby, 1802
Acu	1037	Acu1037	Kirby	1802	bimaculata	(Kirby, 1802)	Melitta	bimaculata	Melitta bimaculata	Kirby, 1802
Acu	1047	Acu1047	Kirby	1802	tibialis	(Kirby, 1802)	Melitta	tibialis	Melitta tibialis	Kirby, 1802
Acu	1061	Acu1061	Kirby	1802	proxima	(Kirby, 1802)	Melitta	proxima	Melitta proxima	Kirby, 1802
Acu	1066	Acu1066	Kirby	1802	angustior	(Kirby, 1802)	Melitta	angustior	Melitta angustior	Kirby, 1802
Acu	1074	Acu1074	Kirby	1802	dorsata	(Kirby, 1802)	Melitta	dorsata	Melitta dorsata	Kirby, 1802
Acu	1083	Acu1083	Kirby	1802	ovatula	(Kirby, 1802)	Melitta	ovatula	Melitta ovatula	Kirby, 1802
Acu	1091	Acu1091	Kirby	1802	wilkella	(Kirby, 1802)	Melitta	wilkella	Melitta wilkella	Kirby, 1802
Acu	1101	Acu1101	Fabricius	1781	haemorrhoa	(Fabricius, 1781)	Apis	haemorrhoa	Apis haemorrhoa	Fabricius, 1781
Acu	1118	Acu1118	Kirby	1802	banksianus	(Kirby, 1802)	Apis	banksianus	Apis banksianus	Kirby, 1802
Acu	1120	Acu1120	Scopoli	1763	calcaratus	(Scopoli, 1763)	Apis	calcaratus	Apis calcaratus	Scopoli, 1763
Acu	1131	Acu1131	Pallas	1772	plumipes	(Pallas, 1772)	Apis	plumipes	Apis plumipes	Pallas, 1772
Acu	1136	Acu1136	Panzer	1798	furcata	(Panzer, 1798)	Apis	furcata	Apis furcata	Panzer, 1798
Acu	1139	Acu1139	Panzer	1798	quadrimaculata	(Panzer, 1798)	Apis	quadrimaculata	Apis quadrimaculata	Panzer, 1798
Acu	1144	Acu1144	Panzer	1798	bimaculata	(Panzer, 1798)	Apis	bimaculata	Apis bimaculata	Panzer, 1798
Acu	1147	Acu1147	Linnaeus	1758	retusa	(Linnaeus, 1758)	Apis	retusa	Apis retusa	Linnaeus, 1758
Acu	116	Acu116	Linnaeus	1758	cribrarius	(Linnaeus, 1758)	Vespa	cribrarius	Vespa cribrarius	Linnaeus, 1758
Acu	1162	Acu1162	Fabricius	1775	cryptarum	(Fabricius, 1775)	Apis	cryptarum	Apis cryptarum	Fabricius, 1775
Acu	1163	Acu1163	Linnaeus	1761	lucorum	(Linnaeus, 1761)	Apis	lucorum	Apis lucorum	Linnaeus, 1761
Acu	1165	Acu1165	Linnaeus	1758	terrestris	(Linnaeus, 1758)	Apis	terrestris	Apis terrestris	Linnaeus, 1758
Acu	1169	Acu1169	Kirby	1802	cullumanus	(Kirby, 1802)	Apis	cullumanus	Apis cullumanus	Kirby, 1802
Acu	1172	Acu1172	Fabricius	1777	soroeensis	(Fabricius, 1777)	Apis	soroeensis	Apis soroeensis	Fabricius, 1777
Acu	1176	Acu1176	Linnaeus	1761	hortorum	(Linnaeus, 1761)	Apis	hortorum	Apis hortorum	Linnaeus, 1761
Acu	1180	Acu1180	Fabricius	1775	ruderatus	(Fabricius, 1775)	Apis	ruderatus	Apis ruderatus	Fabricius, 1775
Acu	1187	Acu1187	Linnaeus	1758	lapidarius	(Linnaeus, 1758)	Apis	lapidarius	Apis lapidarius	Linnaeus, 1758
Acu	1194	Acu1194	Kirby	1802	barbutellus	(Kirby, 1802)	Apis	barbutellus	Apis barbutellus	Kirby, 1802
Acu	1195	Acu1195	Seidl	1837	bohemicus	(Seidl, 1837)	Apis	bohemicus	Apis bohemicus	Seidl, 1837
Acu	1197	Acu1197	Panzer	1801	campestris	(Panzer, 1801)	Apis	campestris	Apis campestris	Panzer, 1801
Acu	1202	Acu1202	Fabricius	1793	rupestris	(Fabricius, 1793)	Apis	rupestris	Apis rupestris	Fabricius, 1793
Acu	1204	Acu1204	Lepeletier	1832	sylvestris	(Lepeletier, 1832)	Psithyrus	sylvestris	Psithyrus sylvestris	Lepeletier, 1832
Acu	1206	Acu1206	Geoffroy	1785	vestalis	(Geoffroy, 1785)	Apis	vestalis	Apis vestalis	Geoffroy, 1785
Acu	1210	Acu1210	Linnaeus	1758	hypnorum	(Linnaeus, 1758)	Apis	hypnorum	Apis hypnorum	Linnaeus, 1758
Acu	1211	Acu1211	Kirby	1802	jonellus	(Kirby, 1802)	Apis	jonellus	Apis jonellus	Kirby, 1802
Acu	1222	Acu1222	Linnaeus	1761	pratorum	(Linnaeus, 1761)	Apis	pratorum	Apis pratorum	Linnaeus, 1761
Acu	1229	Acu1229	Panzer	1805	?pomorum	(Panzer, 1805)	Bremus	?pomorum	Bremus ?pomorum	Panzer, 1805
Acu	1233	Acu1233	Linnaeus	1758	subterraneus	(Linnaeus, 1758)	Apis	subterraneus	Apis subterraneus	Linnaeus, 1758
Acu	124	Acu124	Schreber	1784	peltarius	(Schreber, 1784)	Sphex	peltarius	Sphex peltarius	Schreber, 1784
Acu	1243	Acu1243	Linnaeus	1758	muscorum	(Linnaeus, 1758)	Apis	muscorum	Apis muscorum	Linnaeus, 1758
Acu	1254	Acu1254	Scopoli	1763	pascuorum	(Scopoli, 1763)	Apis	pascuorum	Apis pascuorum	Scopoli, 1763
Acu	1266	Acu1266	Müller	1776	ruderarius	(Müller, 1776)	Apis	ruderarius	Apis ruderarius	Müller, 1776
Acu	1269	Acu1269	Linnaeus	1761	sylvarum	(Linnaeus, 1761)	Apis	sylvarum	Apis sylvarum	Linnaeus, 1761
Acu	1277	Acu1277	Linnaeus	1758	longicornis	(Linnaeus, 1758)	Apis	longicornis	Apis longicornis	Linnaeus, 1758
Acu	128	Acu128	von Scheven	1781	scutellatus	(von Scheven, 1781)	Sphex	scutellatus	Sphex scutellatus	von Scheven, 1781
Acu	1285	Acu1285	Forster	1771	albifrons	(Forster, 1771)	Apis	albifrons	Apis albifrons	Forster, 1771
Acu	1288	Acu1288	Scopoli	1770	luctuosa	(Scopoli, 1770)	Apis	luctuosa	Apis luctuosa	Scopoli, 1770
Acu	1295	Acu1295	Panzer	1799	cruciger	(Panzer, 1799)	Nomada	cruciger	Nomada cruciger	Panzer, 1799
Acu	1297	Acu1297	Linnaeus	1758	variegatus	(Linnaeus, 1758)	Apis	variegatus	Apis variegatus	Linnaeus, 1758
Acu	1312	Acu1312	Linnaeus	1767	fabriciana	(Linnaeus, 1767)	Apis	fabriciana	Apis fabriciana	Linnaeus, 1767
Acu	1315	Acu1315	Linnaeus	1767	ferruginata	(Linnaeus, 1767)	Apis	ferruginata	Apis ferruginata	Linnaeus, 1767
Acu	1320	Acu1320	Kirby	1802	flavoguttata	(Kirby, 1802)	Apis	flavoguttata	Apis flavoguttata	Kirby, 1802
Acu	1322	Acu1322	Kirby	1802	flavopicta	(Kirby, 1802)	Apis	flavopicta	Apis flavopicta	Kirby, 1802
Acu	1331	Acu1331	Kirby	1802	goodeniana	(Kirby, 1802)	Apis	goodeniana	Apis goodeniana	Kirby, 1802
Acu	1343	Acu1343	Kirby	1802	lathburiana	(Kirby, 1802)	Apis	lathburiana	Apis lathburiana	Kirby, 1802
Acu	1345	Acu1345	Kirby	1802	leucophthalma	(Kirby, 1802)	Apis	leucophthalma	Apis leucophthalma	Kirby, 1802
Acu	1348	Acu1348	Kirby	1802	marshamella	(Kirby, 1802)	Apis	marshamella	Apis marshamella	Kirby, 1802
Acu	135	Acu135	Dahlbom	1844	congener	(Dahlbom, 1844)	Crabro	congener	Crabro congener	Dahlbom, 1844
Acu	1356	Acu1356	Linnaeus	1758	ruficornis	(Linnaeus, 1758)	Apis	ruficornis	Apis ruficornis	Linnaeus, 1758
Acu	136	Acu136	Vander Linden	1829	podagricus	(Vander Linden, 1829)	Crabro	podagricus	Crabro podagricus	Vander Linden, 1829
Acu	1365	Acu1365	Kirby	1802	sheppardana	(Kirby, 1802)	Apis	sheppardana	Apis sheppardana	Kirby, 1802
Acu	1380	Acu1380	Kirby	1802	cyanea	(Kirby, 1802)	Apis	cyanea	Apis cyanea	Kirby, 1802
Acu	1386	Acu1386	Linnaeus	1758	violacea	(Linnaeus, 1758)	Apis	violacea	Apis violacea	Linnaeus, 1758
Acu	1397	Acu1397	Geoffroy	1785	fodiens	(Geoffroy, 1785)	Apis	fodiens	Apis fodiens	Geoffroy, 1785
Acu	1403	Acu1403	Linnaeus	1758	succinctus	(Linnaeus, 1758)	Apis	succinctus	Apis succinctus	Linnaeus, 1758
Acu	1406	Acu1406	Linnaeus	1761	cunicularius	(Linnaeus, 1761)	Apis	cunicularius	Apis cunicularius	Linnaeus, 1761
Acu	1423	Acu1423	Kirby	1802	annularis	(Kirby, 1802)	Mellita	annularis	Mellita annularis	Kirby, 1802
Acu	1427	Acu1427	Kirby	1802	dilatatus	(Kirby, 1802)	Mellita	dilatatus	Mellita dilatatus	Kirby, 1802
Acu	143	Acu143	Panzer	1798	vagabundus	(Panzer, 1798)	Crabro	vagabundus	Crabro vagabundus	Panzer, 1798
Acu	1445	Acu1445	Panzer	1798	signatus	(Panzer, 1798)	Sphex	signatus	Sphex signatus	Panzer, 1798
Acu	1460	Acu1460	Christ	1791	rubicundus	(Christ, 1791)	Apis	rubicundus	Apis rubicundus	Christ, 1791
Acu	1469	Acu1469	Rossi	1792	subauratus	(Rossi, 1792)	Apis	subauratus	Apis subauratus	Rossi, 1792
Acu	1471	Acu1471	Linnaeus	1758	tumulorum	(Linnaeus, 1758)	Apis	tumulorum	Apis tumulorum	Linnaeus, 1758
Acu	1476	Acu1476	Pérez	1903	cupromicans	(Pérez, 1903)	Halictus	cupromicans	Halictus cupromicans	Pérez, 1903
Acu	1477	Acu1477	Kirby	1802	leucopus	(Kirby, 1802)	Melitta	leucopus	Melitta leucopus	Kirby, 1802
Acu	1481	Acu1481	Fabricius	1793	morio	(Fabricius, 1793)	Hylaeus	morio	Hylaeus morio	Fabricius, 1793
Acu	1482	Acu1482	Kirby	1802	smeathmanellum	(Kirby, 1802)	Melitta	smeathmanellum	Melitta smeathmanellum	Kirby, 1802
Acu	1485	Acu1485	Fabricius	1781	albipes	(Fabricius, 1781)	Apis	albipes	Apis albipes	Fabricius, 1781
Acu	1486	Acu1486	Perkins	1895	angusticeps	(Perkins, 1895)	Halictus	angusticeps	Halictus angusticeps	Perkins, 1895
Acu	1487	Acu1487	Schenck	1869	brevicorne	(Schenck, 1869)	Halictus	brevicorne	Halictus brevicorne	Schenck, 1869
Acu	1488	Acu1488	Scopoli	1763	calceatum	(Scopoli, 1763)	Apis	calceatum	Apis calceatum	Scopoli, 1763
Acu	1492	Acu1492	Pérez	1903	fratellum	(Pérez, 1903)	Halictus	fratellum	Halictus fratellum	Pérez, 1903
Acu	1496	Acu1496	Kirby	1802	fulvicorne	(Kirby, 1802)	Melitta	fulvicorne	Melitta fulvicorne	Kirby, 1802
Acu	1498	Acu1498	Kirby	1802	laeve	(Kirby, 1802)	Melitta	laeve	Melitta laeve	Kirby, 1802
Acu	1499	Acu1499	Schenck	1869	laticeps	(Schenck, 1869)	Halictus	laticeps	Halictus laticeps	Schenck, 1869
Acu	15	Acu15	Schrank	1781	boops	(Schrank, 1781)	Sphex	boops	Sphex boops	Schrank, 1781
Acu	1501	Acu1501	Kirby	1802	malachurum	(Kirby, 1802)	Melitta	malachurum	Melitta malachurum	Kirby, 1802
Acu	1503	Acu1503	Kirby	1802	minutissimum	(Kirby, 1802)	Melitta	minutissimum	Melitta minutissimum	Kirby, 1802
Acu	1505	Acu1505	Kirby	1802	nitidiusculum	(Kirby, 1802)	Melitta	nitidiusculum	Melitta nitidiusculum	Kirby, 1802
Acu	1506	Acu1506	Schenck	1853	parvulum	(Schenck, 1853)	Hylaeus	parvulum	Hylaeus parvulum	Schenck, 1853
Acu	1508	Acu1508	Brullé	1832	pauperatum	(Brullé, 1832)	Halictus	pauperatum	Halictus pauperatum	Brullé, 1832
Acu	1510	Acu1510	Schenck	1853	pauxillum	(Schenck, 1853)	Hylaeus	pauxillum	Hylaeus pauxillum	Schenck, 1853
Acu	1512	Acu1512	Schenck	1853	punctatissimum	(Schenck, 1853)	Hylaeus	punctatissimum	Hylaeus punctatissimum	Schenck, 1853
Acu	1514	Acu1514	Morawitz	1872	puncticolle	(Morawitz, 1872)	Halictus	puncticolle	Halictus puncticolle	Morawitz, 1872
Acu	1515	Acu1515	Zetterstedt	1838	rufitarse	(Zetterstedt, 1838)	Halictus	rufitarse	Halictus rufitarse	Zetterstedt, 1838
Acu	1517	Acu1517	Alfken	1914	semilucens	(Alfken, 1914)	Halictus	semilucens	Halictus semilucens	Alfken, 1914
Acu	1518	Acu1518	Schenck	1870	sexstrigatum	(Schenck, 1870)	Halictus	sexstrigatum	Halictus sexstrigatum	Schenck, 1870
Acu	1520	Acu1520	Kirby	1802	villosulum	(Kirby, 1802)	Melitta	villosulum	Melitta villosulum	Kirby, 1802
Acu	1524	Acu1524	Kirby	1802	laevigatum	(Kirby, 1802)	Melitta	laevigatum	Melitta laevigatum	Kirby, 1802
Acu	1526	Acu1526	Schenck	1853	lativentre	(Schenck, 1853)	Hylaeus	lativentre	Hylaeus lativentre	Schenck, 1853
Acu	1528	Acu1528	Schrank	1781	leucozonium	(Schrank, 1781)	Apis	leucozonium	Apis leucozonium	Schrank, 1781
Acu	1530	Acu1530	Smith	1848	prasinum	(Smith, 1848)	Halictus	prasinum	Halictus prasinum	Smith, 1848
Acu	1531	Acu1531	Kirby	1802	quadrinotatum	(Kirby, 1802)	Melitta	quadrinotatum	Melitta quadrinotatum	Kirby, 1802
Acu	1532	Acu1532	Kirby	1802	sexnotatum	(Kirby, 1802)	Melitta	sexnotatum	Melitta sexnotatum	Kirby, 1802
Acu	1534	Acu1534	Kirby	1802	xanthopus	(Kirby, 1802)	Melitta	xanthopus	Melitta xanthopus	Kirby, 1802
Acu	1536	Acu1536	Smith	1848	zonulum	(Smith, 1848)	Halictus	zonulum	Halictus zonulum	Smith, 1848
Acu	154	Acu154	Lepeletier & Brullé	1835	annulipes	(Lepeletier & Brullé, 1835)	Blepharipus	annulipes	Blepharipus annulipes	Lepeletier & Brullé, 1835
Acu	1541	Acu1541	Linnaeus	1767	ephippius	(Linnaeus, 1767)	Sphex	ephippius	Sphex ephippius	Linnaeus, 1767
Acu	1545	Acu1545	Kirby	1802	geoffrellus	(Kirby, 1802)	Melitta	geoffrellus	Melitta geoffrellus	Kirby, 1802
Acu	1548	Acu1548	Linnaeus	1758	gibbus	(Linnaeus, 1758)	Sphex	gibbus	Sphex gibbus	Linnaeus, 1758
Acu	1555	Acu1555	Kirby	1802	monilicornis	(Kirby, 1802)	Melitta	monilicornis	Melitta monilicornis	Kirby, 1802
Acu	1571	Acu1571	Nylander	1852	halictula	(Nylander, 1852)	Rhophites	halictula	Rhophites halictula	Nylander, 1852
Acu	1585	Acu1585	Linnaeus	1758	manicatum	(Linnaeus, 1758)	Apis	manicatum	Apis manicatum	Linnaeus, 1758
Acu	1589	Acu1589	Klug	1807	ornatula	(Klug, 1807)	Gyrodroma	ornatula	Gyrodroma ornatula	Klug, 1807
Acu	1591	Acu1591	Kirby	1802	phaeoptera	(Kirby, 1802)	Apis	phaeoptera	Apis phaeoptera	Kirby, 1802
Acu	1592	Acu1592	Kirby	1802	punctulatissima	(Kirby, 1802)	Apis	punctulatissima	Apis punctulatissima	Kirby, 1802
Acu	1602	Acu1602	Illiger	1806	conoidea	(Illiger, 1806)	Anthophora	conoidea	Anthophora conoidea	Illiger, 1806
Acu	1606	Acu1606	Kirby	1802	inermis	(Kirby, 1802)	Apis	inermis	Apis inermis	Kirby, 1802
Acu	161	Acu161	Shuckard	1837	capitosus	(Shuckard, 1837)	Crabro	capitosus	Crabro capitosus	Shuckard, 1837
		Acu161	Shuckard	1837	capitosus	(Shuckard, 1837)	Crabro		Crabro	Shuckard, 1837
Acu	1610	Acu1610	Linnaeus	1758	quadridentata	(Linnaeus, 1758)	Apis	quadridentata	Apis quadridentata	Linnaeus, 1758
Acu	1616	Acu1616	Lepeletier	1841	ericetorum	(Lepeletier, 1841)	Megachile	ericetorum	Megachile ericetorum	Lepeletier, 1841
Acu	1622	Acu1622	Kirby	1802	willughbiella	(Kirby, 1802)	Apis	willughbiella	Apis willughbiella	Kirby, 1802
Acu	1630	Acu1630	Linnaeus	1758	centuncularis	(Linnaeus, 1758)	Apis	centuncularis	Apis centuncularis	Linnaeus, 1758
Acu	1632	Acu1632	Kirby	1802	ligniseca	(Kirby, 1802)	Apis	ligniseca	Apis ligniseca	Kirby, 1802
Acu	1636	Acu1636	Kirby	1802	circumcincta	(Kirby, 1802)	Apis	circumcincta	Apis circumcincta	Kirby, 1802
Acu	1637	Acu1637	Kirby	1802	maritima	(Kirby, 1802)	Apis	maritima	Apis maritima	Kirby, 1802
Acu	164	Acu164	Shuckard	1837	cetratus	(Shuckard, 1837)	Crabro	cetratus	Crabro cetratus	Shuckard, 1837
		Acu164	Shuckard	1837	cetratus	(Shuckard, 1837)	Crabro		Crabro	Shuckard, 1837
Acu	1642	Acu1642	Kirby	1802	campanularum	(Kirby, 1802)	Apis	campanularum	Apis campanularum	Kirby, 1802
Acu	1643	Acu1643	Linnaeus	1758	florisomne	(Linnaeus, 1758)	Apis	florisomne	Apis florisomne	Linnaeus, 1758
Acu	1648	Acu1648	Linnaeus	1758	truncorum	(Linnaeus, 1758)	Apis	truncorum	Apis truncorum	Linnaeus, 1758
Acu	1652	Acu1652	Thomson	1872	claviventris	(Thomson, 1872)	Osmia	claviventris	Osmia claviventris	Thomson, 1872
Acu	1654	Acu1654	Kirby	1802	leucomelana	(Kirby, 1802)	Apis	leucomelana	Apis leucomelana	Kirby, 1802
Acu	1659	Acu1659	Kirby	1802	spinulosa	(Kirby, 1802)	Apis	spinulosa	Apis spinulosa	Kirby, 1802
Acu	1662	Acu1662	Linnaeus	1758	caerulescens	(Linnaeus, 1758)	Apis	caerulescens	Apis caerulescens	Linnaeus, 1758
Acu	1664	Acu1664	Fabricius	1804	niveata	(Fabricius, 1804)	Apis	niveata	Apis niveata	Fabricius, 1804
Acu	1666	Acu1666	Kirby	1802	leaiana	(Kirby, 1802)	Apis	leaiana	Apis leaiana	Kirby, 1802
Acu	1673	Acu1673	Zetterstedt	1838	inermis	(Zetterstedt, 1838)	Anthophora	inermis	Anthophora inermis	Zetterstedt, 1838
Acu	1678	Acu1678	Kirby	1802	xanthomelana	(Kirby, 1802)	Apis	xanthomelana	Apis xanthomelana	Kirby, 1802
Acu	1682	Acu1682	Schrank	1781	bicolor	(Schrank, 1781)	Apis	bicolor	Apis bicolor	Schrank, 1781
Acu	1685	Acu1685	Linnaeus	1758	bicornis	(Linnaeus, 1758)	Apis	bicornis	Apis bicornis	Linnaeus, 1758
Acu	169	Acu169	Linnaeus	1758	leucostomus	(Linnaeus, 1758)	Sphex	leucostomus	Sphex leucostomus	Linnaeus, 1758
		Acu169	Linnaeus	1758	leucostomus	(Linnaeus, 1758)	Sphex		Sphex	Linnaeus, 1758
Acu	1694	Acu1694	Fabricius	1793	hirtipes	(Fabricius, 1793)	Andrena	hirtipes	Andrena hirtipes	Fabricius, 1793
Acu	1710	Acu1710	Fabricius	1775	haemorrhoidalis	(Fabricius, 1775)	Andrena	haemorrhoidalis	Andrena haemorrhoidalis	Fabricius, 1775
Acu	1712	Acu1712	Panzer	1799	leporina	(Panzer, 1799)	Apis	leporina	Apis leporina	Panzer, 1799
Acu	1727	Acu1727	Thomson	1862	boops	(Thomson, 1862)	Anoxus	boops	Anoxus boops	Thomson, 1862
Acu	1728	Acu1728	Förster	1860	cephalotes	(Förster, 1860)	Perisemus	cephalotes	Perisemus cephalotes	Förster, 1860
Acu	1731	Acu1731	Jurine	1807	fuscicornis	(Jurine, 1807)	Omalus	fuscicornis	Omalus fuscicornis	Jurine, 1807
Acu	1745	Acu1745	Förster	1851	claripennis	(Förster, 1851)	Bethylus	claripennis	Bethylus claripennis	Förster, 1851
Acu	1802	Acu1802	Ashmead	1893	chittendenii	(Ashmead, 1893)	Anoxus	chittendenii	Anoxus chittendenii	Ashmead, 1893
Acu	181	Acu181	Rossi	1790	megacephalus	(Rossi, 1790)	Crabro	megacephalus	Crabro megacephalus	Rossi, 1790
		Acu181	Rossi	1790	megacephalus	(Rossi, 1790)	Crabro		Crabro	Rossi, 1790
Acu	1813	Acu1813	Fabricius	1805	depressa	(Fabricius, 1805)	Bethylus	depressa	Bethylus depressa	Fabricius, 1805
Acu	1825	Acu1825	Haliday	1838	subcyaneum	(Haliday, 1838)	Epyris	subcyaneum	Epyris subcyaneum	Haliday, 1838
Acu	1838	Acu1838	Linnaeus	1761	semiauratus	(Linnaeus, 1761)	Sphex	semiauratus	Sphex semiauratus	Linnaeus, 1761
Acu	1844	Acu1844	Fabricius	1793	nitidulus	(Fabricius, 1793)	Ichneumon	nitidulus	Ichneumon nitidulus	Fabricius, 1793
Acu	1855	Acu1855	Förster	1853	gracillima	(Förster, 1853)	Chrysogona	gracillima	Chrysogona gracillima	Förster, 1853
Acu	1857	Acu1857	Linnaeus	1758	ignita	(Linnaeus, 1758)	Sphex	ignita	Sphex ignita	Linnaeus, 1758
Acu	1877	Acu1877	Gerstäcker	1869	hirsuta	(Gerstäcker, 1869)	Chrysis	hirsuta	Chrysis hirsuta	Gerstäcker, 1869
Acu	1879	Acu1879	Harris	1776	radians	(Harris, 1776)	Chrysis	radians	Chrysis radians	Harris, 1776
Acu	1883	Acu1883	Shuckard	1836	neglecta	(Shuckard, 1836)	Chrysis	neglecta	Chrysis neglecta	Shuckard, 1836
Acu	1886	Acu1886	Linnaeus	1758	cyanea	(Linnaeus, 1758)	Sphex	cyanea	Sphex cyanea	Linnaeus, 1758
Acu	1892	Acu1892	Fabricius	1804	panzeri	(Fabricius, 1804)	Chrysis	panzeri	Chrysis panzeri	Fabricius, 1804
Acu	1897	Acu1897	Latreille	1801	ardens	(Latreille, 1801)	Chrysis	ardens	Chrysis ardens	Latreille, 1801
Acu	1898	Acu1898	Dahlbom	1854	coriaceum	(Dahlbom, 1854)	Hedychrum	coriaceum	Hedychrum coriaceum	Dahlbom, 1854
Acu	1899	Acu1899	Dahlbom	1845	cupreum	(Dahlbom, 1845)	Hedychrum	cupreum	Hedychrum cupreum	Dahlbom, 1845
Acu	190	Acu190	Lepeletier & Brullé	1835	nigritus	(Lepeletier & Brullé, 1835)	Blepharipus	nigritus	Blepharipus nigritus	Lepeletier & Brullé, 1835
Acu	1901	Acu1901	Rossi	1790	roseum	(Rossi, 1790)	Chrysis	roseum	Chrysis roseum	Rossi, 1790
Acu	1906	Acu1906	Scopoli	1763	nobile	(Scopoli, 1763)	Sphex	nobile	Sphex nobile	Scopoli, 1763
Acu	1913	Acu1913	Fabricius	1787	aeneus	(Fabricius, 1787)	Chrysis	aeneus	Chrysis aeneus	Fabricius, 1787
Acu	1914	Acu1914	Mocsáry	1887	puncticollis	(Mocsáry, 1887)	Ellampus	puncticollis	Ellampus puncticollis	Mocsáry, 1887
Acu	1917	Acu1917	Dahlbom	1831	truncatus	(Dahlbom, 1831)	Chrysis	truncatus	Chrysis truncatus	Dahlbom, 1831
Acu	1920	Acu1920	Linnaeus	1758	auratus	(Linnaeus, 1758)	Sphex	auratus	Sphex auratus	Linnaeus, 1758
Acu	1921	Acu1921	Scopoli	1763	violaceus	(Scopoli, 1763)	Sphex	violaceus	Sphex violaceus	Scopoli, 1763
Acu	1934	Acu1934	Dalman	1823	brachycerum	(Dalman, 1823)	Dryinus	brachycerum	Dryinus brachycerum	Dalman, 1823
Acu	1946	Acu1946	Dalman	1818	ephippiger	(Dalman, 1818)	Gonatopus	ephippiger	Gonatopus ephippiger	Dalman, 1818
Acu	1954	Acu1954	Haupt	1941	exiguum	(Haupt, 1941)	Chelogynus	exiguum	Chelogynus exiguum	Haupt, 1941
Acu	1958	Acu1958	Thomson	1860	faciale	(Thomson, 1860)	MISSING FROM WORD	faciale	MISSING FROM WORD faciale	Thomson, 1860
Acu	1960	Acu1960	Dalman	1818	flavicorne	(Dalman, 1818)	Gonatopus	flavicorne	Gonatopus flavicorne	Dalman, 1818
Acu	1963	Acu1963	Haliday	1828	fulviventre	(Haliday, 1828)	Dryinus	fulviventre	Dryinus fulviventre	Haliday, 1828
Acu	1977	Acu1977	Haliday	1837	infectum	(Haliday, 1837)	Dryinus	infectum	Dryinus infectum	Haliday, 1837
Acu	200	Acu200	Kohl	1892	styrius	(Kohl, 1892)	Crabro	styrius	Crabro styrius	Kohl, 1892
		Acu200	Kohl	1892	styrius	(Kohl, 1892)	Crabro		Crabro	Kohl, 1892
Acu	2000	Acu2000	Dalman	1818	pubicorne	(Dalman, 1818)	Gonatopus	pubicorne	Gonatopus pubicorne	Dalman, 1818
Acu	2016	Acu2016	Haliday	1837	scapulare	(Haliday, 1837)	Dryinus	scapulare	Dryinus scapulare	Haliday, 1837
Acu	2031	Acu2031	Dalman	1818	ruficornis	(Dalman, 1818)	Gonatopus	ruficornis	Gonatopus ruficornis	Dalman, 1818
Acu	204	Acu204	Shuckard	1837	walkeri	(Shuckard, 1837)	Crabro	walkeri	Crabro walkeri	Shuckard, 1837
		Acu204	Shuckard	1837	walkeri	(Shuckard, 1837)	Crabro		Crabro	Shuckard, 1837
Acu	2074	Acu2074	Dalman	1823	atratus	(Dalman, 1823)	Dryinus	atratus	Dryinus atratus	Dalman, 1823
Acu	2078	Acu2078	Dalman	1818	melaleucus	(Dalman, 1818)	Gonatopus	melaleucus	Gonatopus melaleucus	Dalman, 1818
Acu	2098	Acu2098	Linnaeus	1767	collaris	(Linnaeus, 1767)	Sphex	collaris	Sphex collaris	Linnaeus, 1767
Acu	213	Acu213	Morawitz	1866	distinguendus	(Morawitz, 1866)	Crabro	distinguendus	Crabro distinguendus	Morawitz, 1866
		Acu213	Morawitz	1866	distinguendus	(Morawitz, 1866)	Crabro		Crabro	Morawitz, 1866
Acu	2137	Acu2137	Haliday	1828	bicolor	(Haliday, 1828)	Dryinus	bicolor	Dryinus bicolor	Haliday, 1828
Acu	2144	Acu2144	Thunberg	1827	clavipes	(Thunberg, 1827)	Gelis	clavipes	Gelis clavipes	Thunberg, 1827
Acu	215	Acu215	Vander Linden	1829	elongatulus	(Vander Linden, Crabro)	Crabro	elongatulus	Crabro elongatulus	Vander Linden, Crabro
Acu	2167	Acu2167	Richards	1939	formicicolus	(Richards, 1939)	MISSING FROM WORD	formicicolus	MISSING FROM WORD formicicolus	Richards, 1939
Acu	2190	Acu2190	Westwood	1833	oratorius	(Westwood, 1833)	MISSING FROM WORD	oratorius	MISSING FROM WORD oratorius	Westwood, 1833
Acu	2202	Acu2202	Westwood	1833	ruddii	(Westwood, 1833)	Myrmecomorphus	ruddii	Myrmecomorphus ruddii	Westwood, 1833
Acu	2217	Acu2217	Mayr	1868	# humile	(Mayr, 1868)	Hypoclinea	# humile	Hypoclinea # humile	Mayr, 1868
Acu	2225	Acu2225	Latreille	1798	erraticum	(Latreille, 1798)	Formica	erraticum	Formica erraticum	Latreille, 1798
Acu	232	Acu232	Vander Linden	1829	exiguus	(Vander Linden, Crabro)	Crabro	exiguus	Crabro exiguus	Vander Linden, Crabro
		Acu232	Vander Linden	1829	exiguus	(Vander Linden, 1829)	Crabro		Crabro	Vander Linden, 1829
Acu	2341	Acu2341	Foerster	1850	alienus	(Foerster, 1850)	Formica	alienus	Formica alienus	Foerster, 1850
Acu	2344	Acu2344	Latreille	1798	brunneus	(Latreille, 1798)	Formica	brunneus	Formica brunneus	Latreille, 1798
Acu	2349	Acu2349	Olivier	1792	emarginatus	(Olivier, 1792)	Formica	emarginatus	Formica emarginatus	Olivier, 1792
Acu	2355	Acu2355	Fabricius	1781	flavus	(Fabricius, 1781)	Formica	flavus	Formica flavus	Fabricius, 1781
Acu	2367	Acu2367	Latreille	1798	fuliginosus	(Latreille, 1798)	Formica	fuliginosus	Formica fuliginosus	Latreille, 1798
Acu	2368	Acu2368	Bondroit	1920	meridionalis	(Bondroit, 1920)	Formicina	meridionalis	Formicina meridionalis	Bondroit, 1920
Acu	2369	Acu2369	Nylander	1846	mixtus	(Nylander, 1846)	Formica	mixtus	Formica mixtus	Nylander, 1846
Acu	2372	Acu2372	Linnaeus	1758	niger	(Linnaeus, 1758)	Formica	niger	Formica niger	Linnaeus, 1758
Acu	2382	Acu2382	Bondroit	1918	sabularum	(Bondroit, 1918)	Formicina	sabularum	Formicina sabularum	Bondroit, 1918
Acu	2383	Acu2383	Nylander	1846	umbratus	(Nylander, 1846)	Formica	umbratus	Formica umbratus	Nylander, 1846
Acu	239	Acu239	Linnaeus	1767	palmipes	(Linnaeus, 1767)	Sphex	palmipes	Sphex palmipes	Linnaeus, 1767
		Acu239	Linnaeus	1767	palmipes	(Linnaeus, 1767)	Sphex		Sphex	Linnaeus, 1767
Acu	24	Acu24	Dahlbom	1832	pinguis	(Dahlbom, 1832)	Larra	pinguis	Larra pinguis	Dahlbom, 1832
Acu	2413	Acu2413	Fabricius	1793	# megacephala	(Fabricius, 1793)	Formica	# megacephala	Formica # megacephala	Fabricius, 1793
Acu	2435	Acu2435	Olivier	1792	# scutellaris	(Olivier, 1792)	Formica	# scutellaris	Formica # scutellaris	Olivier, 1792
Acu	2447	Acu2447	Nylander	1846	nitidulus	(Nylander, 1846)	Myrmica	nitidulus	Myrmica nitidulus	Nylander, 1846
Acu	2454	Acu2454	Fabricius	1793	acervorum	(Fabricius, 1793)	Formica	acervorum	Formica acervorum	Fabricius, 1793
Acu	246	Acu246	Shuckard	1837	tarsatus	(Shuckard, 1837)	Crabro	tarsatus	Crabro tarsatus	Shuckard, 1837
		Acu246	Shuckard	1837	tarsatus	(Shuckard, 1837)	Crabro		Crabro	Shuckard, 1837
Acu	2463	Acu2463	Latreille	1802	graminicola	(Latreille, 1802)	Formica	graminicola	Formica graminicola	Latreille, 1802
Acu	2475	Acu2475	Schenck	1852	testaceus	(Schenck, 1852)	Eciton	testaceus	Eciton testaceus	Schenck, 1852
Acu	2490	Acu2490	Curtis	1854	albipennis	(Curtis, 1854)	Stenamma	albipennis	Stenamma albipennis	Curtis, 1854
Acu	2493	Acu2493	Schenck	1852	interruptus	(Schenck, 1852)	Myrmica	interruptus	Myrmica interruptus	Schenck, 1852
Acu	2496	Acu2496	Foerster	1850	nylanderi	(Foerster, 1850)	Myrmica	nylanderi	Myrmica nylanderi	Foerster, 1850
Acu	2500	Acu2500	Latreille	1798	# unifasciatus	(Latreille, 1798)	Formica	# unifasciatus	Formica # unifasciatus	Latreille, 1798
Acu	2518	Acu2518	Schenck	1852	atratulus	(Schenck, 1852)	Myrmica	atratulus	Myrmica atratulus	Schenck, 1852
Acu	2526	Acu2526	Linnaeus	1758	caespitum	(Linnaeus, 1758)	Formica	caespitum	Formica caespitum	Linnaeus, 1758
Acu	2557	Acu2557	Arnol’di	1930	karavajevi	(Arnol’di, 1930)	Symbiomyrma	karavajevi	Symbiomyrma karavajevi	Arnol’di, 1930
Acu	257	Acu257	Vander Linden	1829	wesmaeli	(Vander Linden, Crabro)	Crabro	wesmaeli	Crabro wesmaeli	Vander Linden, Crabro
		Acu257	Vander Linden	1829	wesmaeli	(Vander Linden, 1829)	Crabro		Crabro	Vander Linden, 1829
Acu	2574	Acu2574	Linnaeus	1758	rubra	(Linnaeus, 1758)	Formica	rubra	Formica rubra	Linnaeus, 1758
Acu	2658	Acu2658	Latreille	1798	fugax	(Latreille, 1798)	Formica	fugax	Formica fugax	Latreille, 1798
Acu	266	Acu266	Fabricius	1781	dimidiatus	(Fabricius, 1781)	Crabro	dimidiatus	Crabro dimidiatus	Fabricius, 1781
		Acu266	Fabricius	1781	dimidiatus	(Fabricius, 1781)	Crabro		Crabro	Fabricius, 1781
Acu	2688	Acu2688	Förster	1850	debile	(Förster, 1850)	Myrmica	debile	Myrmica debile	Förster, 1850
Acu	2698	Acu2698	Forel	1912	[# gibbinota	(Forel, 1912)	Ponera	[# gibbinota	Ponera [# gibbinota	Forel, 1912
Acu	2728	Acu2728	Latreille	1802	coarctata	(Latreille, 1802)	Formica	coarctata	Formica coarctata	Latreille, 1802
Acu	2743	Acu2743	Fabricius	1787	rufipes	(Fabricius, 1787)	Mutilla	rufipes	Mutilla rufipes	Fabricius, 1787
Acu	276	Acu276	Fabricius	1793	quadrimaculatus	(Fabricius, 1793)	Crabro	quadrimaculatus	Crabro quadrimaculatus	Fabricius, 1793
		Acu276	Fabricius	1793	quadrimaculatus	(Fabricius, 1793)	Crabro		Crabro	Fabricius, 1793
Acu	2761	Acu2761	Scopoli	1763	carbonarius	(Scopoli, 1763)	Sphex	carbonarius	Sphex carbonarius	Scopoli, 1763
Acu	2771	Acu2771	Spinola	1808	fasciatellus	(Spinola, 1808)	Pompilus	fasciatellus	Pompilus fasciatellus	Spinola, 1808
Acu	2788	Acu2788	Rossi	1792	notatus	(Rossi, 1792)	Sphex	notatus	Sphex notatus	Rossi, 1792
Acu	2800	Acu2800	Geoffroy	1785	bifasciatus	(Geoffroy, 1785)	Ichneumon	bifasciatus	Ichneumon bifasciatus	Geoffroy, 1785
Acu	2803	Acu2803	Magretti	1886	subintermedius	(Magretti, 1886)	Pogonius	subintermedius	Pogonius subintermedius	Magretti, 1886
Acu	2805	Acu2805	Linnaeus	1758	variegatus	(Linnaeus, 1758)	Sphex	variegatus	Sphex variegatus	Linnaeus, 1758
Acu	2813	Acu2813	Shuckard	1837	agilis	(Shuckard, 1837)	Pompilus	agilis	Pompilus agilis	Shuckard, 1837
Acu	2820	Acu2820	Fabricius	1775	exaltata	(Fabricius, 1775)	Sphex	exaltata	Sphex exaltata	Fabricius, 1775
Acu	2827	Acu2827	Fabricius	1793	hyalinata	(Fabricius, 1793)	Sphex	hyalinata	Sphex hyalinata	Fabricius, 1793
Acu	2842	Acu2842	Lepeletier	1845	propinqua	(Lepeletier, 1845)	Calicurgus	propinqua	Calicurgus propinqua	Lepeletier, 1845
Acu	2844	Acu2844	Schiødte	1837	pusilla	(Schiødte, 1837)	Pompilus	pusilla	Pompilus pusilla	Schiødte, 1837
Acu	2851	Acu2851	Harris	1780	perturbator	(Harris, 1780)	Sphex	perturbator	Sphex perturbator	Harris, 1780
Acu	286	Acu286	Thomson	1870	cavifrons	(Thomson, 1870)	Crabro	cavifrons	Crabro cavifrons	Thomson, 1870
		Acu286	Thomson	1870	cavifrons	(Thomson, 1870)	Crabro		Crabro	Thomson, 1870
Acu	2867	Acu2867	Spinola	1808	cinctellus	(Spinola, 1808)	Pompilus	cinctellus	Pompilus cinctellus	Spinola, 1808
Acu	2871	Acu2871	Vander Linden	1827	sericeus	(Vander Linden, 1827)	Pompilus	sericeus	Pompilus sericeus	Vander Linden, 1827
Acu	288	Acu288	Panzer	1804	lapidarius	(Panzer, 1804)	Crabro	lapidarius	Crabro lapidarius	Panzer, 1804
		Acu288	Panzer	1804	lapidarius	(Panzer, 1804)	Crabro		Crabro	Panzer, 1804
Acu	2880	Acu2880	Aurivillius	1907	caviventris	(Aurivillius, 1907)	Pompilus	caviventris	Pompilus caviventris	Aurivillius, 1907
Acu	2884	Acu2884	Dahlbom	1845	concinnus	(Dahlbom, 1845)	Pompilus	concinnus	Pompilus concinnus	Dahlbom, 1845
Acu	2890	Acu2890	Scopoli	1763	nigerrimus	(Scopoli, 1763)	Sphex	nigerrimus	Sphex nigerrimus	Scopoli, 1763
Acu	2901	Acu2901	Vander Linden	1827	infuscatus	(Vander Linden, 1827)	Pompilus	infuscatus	Pompilus infuscatus	Vander Linden, 1827
Acu	2923	Acu2923	Linnaeus	1758	viaticus	(Linnaeus, 1758)	Sphex	viaticus	Sphex viaticus	Linnaeus, 1758
Acu	2947	Acu2947	Wesmael	1851	anceps	(Wesmael, 1851)	Pompilus	anceps	Pompilus anceps	Wesmael, 1851
Acu	2958	Acu2958	Dahlbom	1843	consobrina	(Dahlbom, 1843)	Pompilus	consobrina	Pompilus consobrina	Dahlbom, 1843
Acu	2971	Acu2971	Dahlbom	1843	trivialis	(Dahlbom, 1843)	Pompilus	trivialis	Pompilus trivialis	Dahlbom, 1843
Acu	2977	Acu2977	Thomson	1870	wesmaeli	(Thomson, 1870)	Pompilus	wesmaeli	Pompilus wesmaeli	Thomson, 1870
Acu	2980	Acu2980	Dahlbom	1842	minutula	(Dahlbom, 1842)	Pompilus	minutula	Pompilus minutula	Dahlbom, 1842
Acu	2987	Acu2987	Schiødte	1837	spissa	(Schiødte, 1837)	Pompilus	spissa	Pompilus spissa	Schiødte, 1837
Acu	299	Acu299	Zetterstedt	1838	ruficornis	(Zetterstedt, 1838)	Crabro	ruficornis	Crabro ruficornis	Zetterstedt, 1838
		Acu299	Zetterstedt	1838	ruficornis	(Zetterstedt, 1838)	Crabro		Crabro	Zetterstedt, 1838
Acu	2992	Acu2992	Haupt	1927	rufa	(Haupt, 1927)	Psammochares	rufa	Psammochares rufa	Haupt, 1927
Acu	2998	Acu2998	Tournier	1889	gallicum	(Tournier, 1889)	Pompilus	gallicum	Pompilus gallicum	Tournier, 1889
Acu	3001	Acu3001	Linnaeus	1758	rufipes	(Linnaeus, 1758)	Sphex	rufipes	Sphex rufipes	Linnaeus, 1758
Acu	3023	Acu3023	Shuckard	1835	crassicornis	(Shuckard, 1835)	Pompilus	crassicornis	Pompilus crassicornis	Shuckard, 1835
Acu	3026	Acu3026	Vander Linden	1827	dubius	(Vander Linden, 1827)	Aporus	dubius	Aporus dubius	Vander Linden, 1827
Acu	3032	Acu3032	Linnaeus	1758	pectinipes	(Linnaeus, 1758)	Sphex	pectinipes	Sphex pectinipes	Linnaeus, 1758
Acu	3040	Acu3040	Fabricius	1793	sanguinolentus	(Fabricius, 1793)	Sphex	sanguinolentus	Sphex sanguinolentus	Fabricius, 1793
Acu	3050	Acu3050	Fabricius	1775	cinereus	(Fabricius, 1775)	Sphex	cinereus	Sphex cinereus	Fabricius, 1775
Acu	3064	Acu3064	Fabricius	1775	maculata	(Fabricius, 1775)	Evania	maculata	Evania maculata	Fabricius, 1775
Acu	3070	Acu3070	Fabricius	1798	variegata	(Fabricius, 1798)	Evania	variegata	Evania variegata	Fabricius, 1798
Acu	3076	Acu3076	Linnaeus	1758	clavicornis	(Linnaeus, 1758)	Apis	clavicornis	Apis clavicornis	Linnaeus, 1758
Acu	3079	Acu3079	Fabricius	1781	quinquepunctata	(Fabricius, 1781)	Scolia	quinquepunctata	Scolia quinquepunctata	Fabricius, 1781
Acu	308	Acu308	Fabricius	1775	sexcinctus	(Fabricius, 1775)	Crabro	sexcinctus	Crabro sexcinctus	Fabricius, 1775
		Acu308	Fabricius	1775	sexcinctus	(Fabricius, 1775)	Crabro		Crabro	Fabricius, 1775
Acu	3105	Acu3105	Panzer	1798	antilope	(Panzer, 1798)	Vespa	antilope	Vespa antilope	Panzer, 1798
Acu	3109	Acu3109	Panzer	1798	gazella	(Panzer, 1798)	Vespa	gazella	Vespa gazella	Panzer, 1798
Acu	3111	Acu3111	Curtis	1826	nigricornis	(Curtis, 1826)	Odynerus	nigricornis	Odynerus nigricornis	Curtis, 1826
Acu	3115	Acu3115	Wesmael	1836	oviventris	(Wesmael, 1836)	Odynerus	oviventris	Odynerus oviventris	Wesmael, 1836
Acu	3118	Acu3118	Linnaeus	1758	parietinus	(Linnaeus, 1758)	Vespa	parietinus	Vespa parietinus	Linnaeus, 1758
Acu	3121	Acu3121	Linnaeus	1758	parietum	(Linnaeus, 1758)	Vespa	parietum	Vespa parietum	Linnaeus, 1758
Acu	3122	Acu3122	Curtis	1826	scoticus	(Curtis, 1826)	Odynerus	scoticus	Odynerus scoticus	Curtis, 1826
Acu	3125	Acu3125	Müller	1776	trifasciatus	(Müller, 1776)	Vespa	trifasciatus	Vespa trifasciatus	Müller, 1776
Acu	3130	Acu3130	Linnaeus	1758	coarctatus	(Linnaeus, 1758)	Vespa	coarctatus	Vespa coarctatus	Linnaeus, 1758
Acu	3135	Acu3135	Fabricius	1793	quadrifasciatus	(Fabricius, 1793)	Vespa	quadrifasciatus	Vespa quadrifasciatus	Fabricius, 1793
Acu	3139	Acu3139	Shuckard	1837	laevipes	(Shuckard, 1837)	Odynerus	laevipes	Odynerus laevipes	Shuckard, 1837
Acu	3142	Acu3142	Herrich-Schäffer	1839	exilis	(Herrich-Schäffer, 1839)	Odynerus	exilis	Odynerus exilis	Herrich-Schäffer, 1839
Acu	3147	Acu3147	Gmelin	1790	melanocephalus	(Gmelin, 1790)	Vespa	melanocephalus	Vespa melanocephalus	Gmelin, 1790
Acu	3148	Acu3148	Linnaeus	1758	spinipes	(Linnaeus, 1758)	Vespa	spinipes	Vespa spinipes	Linnaeus, 1758
Acu	3153	Acu3153	Gmelin	1790	reniformis	(Gmelin, 1790)	Vespa	reniformis	Vespa reniformis	Gmelin, 1790
Acu	3157	Acu3157	Saussure	1855	herrichii	(Saussure, 1855)	Odynerus	herrichii	Odynerus herrichii	Saussure, 1855
Acu	3162	Acu3162	Linnaeus	1761	bifasciatus	(Linnaeus, 1761)	Vespa	bifasciatus	Vespa bifasciatus	Linnaeus, 1761
Acu	3166	Acu3166	Curtis	1826	connexus	(Curtis, 1826)	Odynerus	connexus	Odynerus connexus	Curtis, 1826
Acu	3168	Acu3168	Panzer	1798	crassicornis	(Panzer, 1798)	Vespa	crassicornis	Vespa crassicornis	Panzer, 1798
Acu	3169	Acu3169	Brullé	1832	gracilis	(Brullé, 1832)	Odynerus	gracilis	Odynerus gracilis	Brullé, 1832
Acu	3174	Acu3174	Christ	1791	dominula	(Christ, 1791)	Vespa	dominula	Vespa dominula	Christ, 1791
Acu	3187	Acu3187	Linnaeus	1767	gallicus	(Linnaeus, 1767)	Vespa	gallicus	Vespa gallicus	Linnaeus, 1767
Acu	3198	Acu3198	Retzius	1783	media	(Retzius, 1783)	Vespa	media	Vespa media	Retzius, 1783
Acu	3208	Acu3208	Fabricius	1781	norwegica	(Fabricius, 1781)	Vespa	norwegica	Vespa norwegica	Fabricius, 1781
Acu	3215	Acu3215	Fabricius	1793	saxonica	(Fabricius, 1793)	Vespa	saxonica	Vespa saxonica	Fabricius, 1793
Acu	3221	Acu3221	Scopoli	1763	sylvestris	(Scopoli, 1763)	Vespa	sylvestris	Vespa sylvestris	Scopoli, 1763
Acu	324	Acu324	Zetterstedt	1838	borealis	(Zetterstedt, 1838)	Crabro	borealis	Crabro borealis	Zetterstedt, 1838
		Acu324	Zetterstedt	1838	borealis	(Zetterstedt, 1838)	Crabro		Crabro	Zetterstedt, 1838
Acu	3258	Acu3258	Panzer	1799	austriaca	(Panzer, 1799)	Vespa	austriaca	Vespa austriaca	Panzer, 1799
Acu	3264	Acu3264	Fabricius	1793	germanica	(Fabricius, 1793)	Vespa	germanica	Vespa germanica	Fabricius, 1793
Acu	3267	Acu3267	Linnaeus	1758	rufa	(Linnaeus, 1758)	Vespa	rufa	Vespa rufa	Linnaeus, 1758
Acu	3274	Acu3274	Linnaeus	1758	vulgaris	(Linnaeus, 1758)	Vespa	vulgaris	Vespa vulgaris	Linnaeus, 1758
Acu	330	Acu330	Lepeletier & Brullé	1835	dives	(Lepeletier & Brullé, 1835)	Solenius	dives	Solenius dives	Lepeletier & Brullé, 1835
Acu	34	Acu34	Fabricius	1798	lunicornis	(Fabricius, 1798)	Pompilus	lunicornis	Pompilus lunicornis	Fabricius, 1798
Acu	344	Acu344	Fabricius	1804	continuus	(Fabricius, 1804)	Crabro	continuus	Crabro continuus	Fabricius, 1804
Acu	356	Acu356	Dufour & Perris	1840	rubicola	(Dufour & Perris, 1840)	Solenius	rubicola	Solenius rubicola	Dufour & Perris, 1840
Acu	362	Acu362	Olivier	1792	cephalotes	(Olivier, 1792)	Crabro	cephalotes	Crabro cephalotes	Olivier, 1792
Acu	377	Acu377	Panzer	1805	lituratus	(Panzer, 1805)	Crabro	lituratus	Crabro lituratus	Panzer, 1805
Acu	393	Acu393	Vander Linden	1829	brevis	(Vander Linden, 1829)	Crabro	brevis	Crabro brevis	Vander Linden, 1829
Acu	40	Acu40	Shuckard	1837	fargeii	(Shuckard, 1837)	Gorytes	fargeii	Gorytes fargeii	Shuckard, 1837
Acu	400	Acu400	Schreber	1759	clypeata	(Schreber, 1759)	Apis	clypeata	Apis clypeata	Schreber, 1759
Acu	411	Acu411	Fabricius	1793	albilabris	(Fabricius, 1793)	Crabro	albilabris	Crabro albilabris	Fabricius, 1793
Acu	413	Acu413	Vander Linden	1829	panzeri	(Vander Linden, 1829)	Crabro	panzeri	Crabro panzeri	Vander Linden, 1829
Acu	418	Acu418	Rossi	1794	pygmaeus	(Rossi, 1794)	Crabro	pygmaeus	Crabro pygmaeus	Rossi, 1794
Acu	426	Acu426	Linnaeus	1758	clavipes	(Linnaeus, 1758)	Sphex	clavipes	Sphex clavipes	Linnaeus, 1758
Acu	432	Acu432	Scopoli	1763	coarctatum	(Scopoli, 1763)	Sphex	coarctatum	Sphex coarctatum	Scopoli, 1763
Acu	44	Acu44	Linnaeus	1761	mystaceus	(Linnaeus, 1761)	Sphex	mystaceus	Sphex mystaceus	Linnaeus, 1761
Acu	446	Acu446	Spinola	1805	nitidus	(Spinola, 1805)	Astata	nitidus	Astata nitidus	Spinola, 1805
Acu	449	Acu449	Schenck	1857	obscuripennis	(Schenck, 1857)	Tachytes	obscuripennis	Tachytes obscuripennis	Schenck, 1857
Acu	451	Acu451	Panzer	1805	pompiliformis	(Panzer, 1805)	Larra	pompiliformis	Larra pompiliformis	Panzer, 1805
Acu	467	Acu467	Panzer	1809	unicolor	(Panzer, 1809)	Larra	unicolor	Larra unicolor	Panzer, 1809
Acu	510	Acu510	Linnaeus	1758	uniglumis	(Linnaeus, 1758)	Vespa	uniglumis	Vespa uniglumis	Linnaeus, 1758
Acu	533	Acu533	Linnaeus	1758	figulus	(Linnaeus, 1758)	Sphex	figulus	Sphex figulus	Linnaeus, 1758
Acu	547	Acu547	Fabricius	1793	pictus	(Fabricius, 1793)	Crabro	pictus	Crabro pictus	Fabricius, 1793
Acu	553	Acu553	Linnaeus	1758	arvensis	(Linnaeus, 1758)	Vespa	arvensis	Vespa arvensis	Linnaeus, 1758
Acu	574	Acu574	Thunberg	1791	crabroneus	(Thunberg, 1791)	Sphex	crabroneus	Sphex crabroneus	Thunberg, 1791
Acu	594	Acu594	Fabricius	1793	minutus	(Fabricius, 1793)	Crabro	minutus	Crabro minutus	Fabricius, 1793
Acu	596	Acu596	Vander Linden	1829	tristis	(Vander Linden, 1829)	Pemphredon	tristis	Pemphredon tristis	Vander Linden, 1829
Acu	60	Acu60	Lepeletier	1832	laticinctus	(Lepeletier, 1832)	Euspongus	laticinctus	Euspongus laticinctus	Lepeletier, 1832
Acu	606	Acu606	Curtis	1834	gracilis	(Curtis, 1834)	Diodontus	gracilis	Diodontus gracilis	Curtis, 1834
Acu	61	Acu61	Fabricius	1804	quadrifasciatus	(Fabricius, 1804)	Mellinus	quadrifasciatus	Mellinus quadrifasciatus	Fabricius, 1804
Acu	610	Acu610	Vander Linden	1829	insignis	(Vander Linden, 1829)	Pemphredon	insignis	Pemphredon insignis	Vander Linden, 1829
Acu	627	Acu627	Kohl	1888	austriaca	(Kohl, 1888)	Diphlebus	austriaca	Diphlebus austriaca	Kohl, 1888
Acu	636	Acu636	Shuckard	1837	lethifer	(Shuckard, 1837)	Cemonus	lethifer	Cemonus lethifer	Shuckard, 1837
Acu	655	Acu655	Fabricius	1793	lugubris	(Fabricius, 1793)	Crabro	lugubris	Crabro lugubris	Fabricius, 1793
Acu	670	Acu670	Dahlbom	1844	rugifer	(Dahlbom, 1844)	Cemonus	rugifer	Cemonus rugifer	Dahlbom, 1844
Acu	69	Acu69	Panzer	1801	tumidus	(Panzer, 1801)	Pompilus	tumidus	Pompilus tumidus	Panzer, 1801
Acu	690	Acu690	Dahlbom	1844	curruca	(Dahlbom, 1844)	Celia	curruca	Celia curruca	Dahlbom, 1844
Acu	694	Acu694	Vander Linden	1829	troglodytes	(Vander Linden, 1829)	Stigmus	troglodytes	Stigmus troglodytes	Vander Linden, 1829
Acu	713	Acu713	Jurine	1807	bicolor	(Jurine, 1807)	Psen	bicolor	Psen bicolor	Jurine, 1807
Acu	718	Acu718	Fabricius	1804	equestris	(Fabricius, 1804)	Trypoxylon	equestris	Trypoxylon equestris	Fabricius, 1804
Acu	720	Acu720	Fabricius	1787	lutaria	(Fabricius, 1787)	Sphex	lutaria	Sphex lutaria	Fabricius, 1787
Acu	728	Acu728	Morawitz	1891	atratina	(Morawitz, 1891)	Mimesa	atratina	Mimesa atratina	Morawitz, 1891
Acu	733	Acu733	Wesmael	1852	dahlbomi	(Wesmael, 1852)	Mimesa	dahlbomi	Mimesa dahlbomi	Wesmael, 1852
Acu	734	Acu734	Bondroit	1934	littoralis	(Bondroit, 1934)	Mimesa	littoralis	Mimesa littoralis	Bondroit, 1934
Acu	739	Acu739	Richards	1948	spooneri	(Richards, 1948)	Mimesa	spooneri	Mimesa spooneri	Richards, 1948
Acu	740	Acu740	Vander Linden	1829	unicolor	(Vander Linden, 1829)	Psen	unicolor	Psen unicolor	Vander Linden, 1829
Acu	751	Acu751	Olivier	1792	ater	(Olivier, 1792)	Crabro	ater	Crabro ater	Olivier, 1792
Acu	76	Acu76	Rossi	1794	bicinctus	(Rossi, 1794)	Crabro	bicinctus	Crabro bicinctus	Rossi, 1794
Acu	763	Acu763	Dahlbom	1843	concolor	(Dahlbom, 1843)	Psen	concolor	Psen concolor	Dahlbom, 1843
Acu	766	Acu766	Panzer	1798	pallipes	(Panzer, 1798)	Sphex	pallipes	Sphex pallipes	Panzer, 1798
Acu	776	Acu776	Tournier	1889	schencki	(Tournier, 1889)	Psen	schencki	Psen schencki	Tournier, 1889
Acu	793	Acu793	Linnaeus	1758	arenaria	(Linnaeus, 1758)	Sphex	arenaria	Sphex arenaria	Linnaeus, 1758
Acu	801	Acu801	Panzer	1799	quadricincta	(Panzer, 1799)	Philanthus	quadricincta	Philanthus quadricincta	Panzer, 1799
Acu	803	Acu803	Rossi	1792	quinquefasciata	(Rossi, 1792)	Crabro	quinquefasciata	Crabro quinquefasciata	Rossi, 1792
Acu	807	Acu807	Fabricius	1793	ruficornis	(Fabricius, 1793)	Philanthus	ruficornis	Philanthus ruficornis	Fabricius, 1793
Acu	815	Acu815	Linnaeus	1771	rybyensis	(Linnaeus, 1771)	Sphex	rybyensis	Sphex rybyensis	Linnaeus, 1771
Acu	826	Acu826	Panzer	1799	sabulosa	(Panzer, 1799)	Philanthus	sabulosa	Philanthus sabulosa	Panzer, 1799
Acu	843	Acu843	Fabricius	1775	triangulum	(Fabricius, 1775)	Vespa	triangulum	Vespa triangulum	Fabricius, 1775
Acu	85	Acu85	Fabricius	1798	interruptus	(Fabricius, 1798)	Mellinus	interruptus	Mellinus interruptus	Fabricius, 1798
Acu	869	Acu869	Linnaeus	1758	sabulosa	(Linnaeus, 1758)	Sphex	sabulosa	Sphex sabulosa	Linnaeus, 1758
Acu	883	Acu883	Kirby	1798	affinis	(Kirby, 1798)	Ammophila	affinis	Ammophila affinis	Kirby, 1798
Acu	886	Acu886	Scopoli	1763	hirsuta	(Scopoli, 1763)	Sphex	hirsuta	Sphex hirsuta	Scopoli, 1763
Acu	89	Acu89	Forster	1771	spinosus	(Forster, 1771)	Sphex	spinosus	Sphex spinosus	Forster, 1771
Acu	903	Acu903	Kirby	1802	clarkella	(Kirby, 1802)	Melitta	clarkella	Melitta clarkella	Kirby, 1802
Acu	905	Acu905	Müller	1766	fulva	(Müller, 1766)	Apis	fulva	Apis fulva	Müller, 1766
Acu	907	Acu907	Linnaeus	1758	helvola	(Linnaeus, 1758)	Apis	helvola	Apis helvola	Linnaeus, 1758
Acu	910	Acu910	Scopoli	1763	praecox	(Scopoli, 1763)	Apis	praecox	Apis praecox	Scopoli, 1763
Acu	915	Acu915	Kirby	1802	varians	(Kirby, 1802)	Melitta	varians	Melitta varians	Kirby, 1802
Acu	920	Acu920	Fabricius	1775	hattorfiana	(Fabricius, 1775)	Nomada	hattorfiana	Nomada hattorfiana	Fabricius, 1775
Acu	928	Acu928	Christ	1791	fulvago	(Christ, 1791)	Apis	fulvago	Apis fulvago	Christ, 1791
Acu	932	Acu932	Kirby	1802	denticulata	(Kirby, 1802)	Melitta	denticulata	Melitta denticulata	Kirby, 1802
Acu	934	Acu934	Kirby	1802	fuscipes	(Kirby, 1802)	Melitta	fuscipes	Melitta fuscipes	Kirby, 1802
Acu	935	Acu935	Kirby	1802	nigriceps	(Kirby, 1802)	Melitta	nigriceps	Melitta nigriceps	Kirby, 1802
Acu	938	Acu938	Kirby	1802	tridentata	(Kirby, 1802)	Melitta	tridentata	Melitta tridentata	Kirby, 1802
Acu	954	Acu954	Kirby	1802	labialis	(Kirby, 1802)	Melitta	labialis	Melitta labialis	Kirby, 1802
Acu	96	Acu96	Rossi	1790	trimaculatus	(Rossi, 1790)	MISSING FROM WORD	trimaculatus	MISSING FROM WORD trimaculatus	Rossi, 1790
Acu	972	Acu972	Kirby	1802	trimmerana	(Kirby, 1802)	Melitta	trimmerana	Melitta trimmerana	Kirby, 1802
Acu	978	Acu978	Kirby	1802	barbilabris	(Kirby, 1802)	Melitta	barbilabris	Melitta barbilabris	Kirby, 1802
Acu	992	Acu992	Linnaeus	1758	cineraria	(Linnaeus, 1758)	Apis	cineraria	Apis cineraria	Linnaeus, 1758
Acu	993	Acu993	Kirby	1802	nigroaenea	(Kirby, 1802)	Melitta	nigroaenea	Melitta nigroaenea	Kirby, 1802
Acu	995	Acu995	Müller	1776	nitida	(Müller, 1776)	Apis	nitida	Apis nitida	Müller, 1776
Acu	998	Acu998	Fabricius	1775	thoracica	(Fabricius, 1775)	Apis	thoracica	Apis thoracica	Fabricius, 1775
diap	169	diap169	Kieffer	1907	fuscipes	(Kieffer, 1907)	Pantoclis	fuscipes	Pantoclis fuscipes	Kieffer, 1907
diap	178	diap178	Kieffer	1907	lusitanicus	(Kieffer, 1907)	Miota	lusitanicus	Miota lusitanicus	Kieffer, 1907
diap	198	diap198	Kieffer	1910	compressa	(Kieffer, 1910)	Miota	compressa	Miota compressa	Kieffer, 1910
diap	199	diap199	Kieffer	1910	longiventris	(Kieffer, 1910)	Miota	longiventris	Miota longiventris	Kieffer, 1910
diap	202	diap202	Nees	1834	bisulca	(Nees, 1834)	Belyta	bisulca	Belyta bisulca	Nees, 1834
diap	216	diap216	Nixon	1957	fragilis	(Nixon, 1957)	Cinelaptus	fragilis	Cinelaptus fragilis	Nixon, 1957
diap	220	diap220	Kieffer	1907	abbreviata	(Kieffer, 1907)	Leptorhaptus	abbreviata	Leptorhaptus abbreviata	Kieffer, 1907
diap	221	diap221	Kieffer	1910	analis	(Kieffer, 1910)	Leptorhaptus	analis	Leptorhaptus analis	Kieffer, 1910
diap	222	diap222	Kieffer	1910	atriceps	(Kieffer, 1910)	Leptorhaptus	atriceps	Leptorhaptus atriceps	Kieffer, 1910
diap	223	diap223	Thomson	1859	compressa	(Thomson, 1859)	Cinetus	compressa	Cinetus compressa	Thomson, 1859
diap	224	diap224	Nixon	1957	docilis	(Nixon, 1957)	Leptorhaptus	docilis	Leptorhaptus docilis	Nixon, 1957
diap	225	diap225	Kieffer	1910	egregia	(Kieffer, 1910)	Leptorhaptus	egregia	Leptorhaptus egregia	Kieffer, 1910
diap	226	diap226	Kieffer	1910	flavidicornis	(Kieffer, 1910)	Leptorhaptus	flavidicornis	Leptorhaptus flavidicornis	Kieffer, 1910
diap	227	diap227	Kieffer	1907	fungorum	(Kieffer, 1907)	Leptorhaptus	fungorum	Leptorhaptus fungorum	Kieffer, 1907
diap	229	diap229	Kieffer	1910	incisa	(Kieffer, 1910)	Leptorhaptus	incisa	Leptorhaptus incisa	Kieffer, 1910
diap	230	diap230	Kieffer	1910	monilicornis	(Kieffer, 1910)	Leptorhaptus	monilicornis	Leptorhaptus monilicornis	Kieffer, 1910
diap	232	diap232	Kieffer	1910	perplexa	(Kieffer, 1910)	Leptorhaptus	perplexa	Leptorhaptus perplexa	Kieffer, 1910
diap	233	diap233	Thomson	1858	polita	(Thomson, 1858)	Cinetus	polita	Cinetus polita	Thomson, 1858
diap	238	diap238	Kieffer	1910	tenuicornis	(Kieffer, 1910)	Leptorhaptus	tenuicornis	Leptorhaptus tenuicornis	Kieffer, 1910
diap	244	diap244	Chambers	1974	longiscapa	(Chambers, 1974)	Pantoclis	longiscapa	Pantoclis longiscapa	Chambers, 1974
diap	249	diap249	Kieffer	1916	brevior	(Kieffer, 1916)	Acropiesta	brevior	Acropiesta brevior	Kieffer, 1916
diap	25	diap25	Kieffer	1909	acuta	(Kieffer, 1909)	Anectata	acuta	Anectata acuta	Kieffer, 1909
diap	252	diap252	Nees	1834	?brevis	(Nees, 1834)	Belyta	?brevis	Belyta ?brevis	Nees, 1834
diap	253	diap253	Thomson	1858	carinata	(Thomson, 1858)	Belyta	carinata	Belyta carinata	Thomson, 1858
diap	258	diap258	Kieffer	1907	leviventris	(Kieffer, 1907)	Oxylabis	leviventris	Oxylabis leviventris	Kieffer, 1907
diap	259	diap259	Thomson	1858	longipennis	(Thomson, 1858)	Belyta	longipennis	Belyta longipennis	Thomson, 1858
diap	26	diap26	Thomson	1858	alticollis	(Thomson, 1858)	Acoretus	alticollis	Acoretus alticollis	Thomson, 1858
diap	265	diap265	Thomson	1858	similis	(Thomson, 1858)	Belyta	similis	Belyta similis	Thomson, 1858
diap	267	diap267	Thomson	1858	striola	(Thomson, 1858)	Belyta	striola	Belyta striola	Thomson, 1858
diap	270	diap270	Thomson	1858	sulcata	(Thomson, 1858)	Belyta	sulcata	Belyta sulcata	Thomson, 1858
diap	275	diap275	Nixon	1957	cebes	(Nixon, 1957)	Miota	cebes	Miota cebes	Nixon, 1957
diap	278	diap278	Thomson	1858	fuscipennis	(Thomson, 1858)	Belyta	fuscipennis	Belyta fuscipennis	Thomson, 1858
diap	283	diap283	Kieffer	1909	brevinervis	(Kieffer, 1909)	Aclista	brevinervis	Aclista brevinervis	Kieffer, 1909
diap	284	diap284	Thomson	1858	claviscapa	(Thomson, 1858)	Belyta	claviscapa	Belyta claviscapa	Thomson, 1858
diap	286	diap286	Zetterstedt	1840	excisor	(Zetterstedt, 1840)	Psilus	excisor	Psilus excisor	Zetterstedt, 1840
diap	289	diap289	Thomson	1858	fossulata	(Thomson, 1858)	Belyta	fossulata	Belyta fossulata	Thomson, 1858
diap	290	diap290	Thomson	1858	fuscata	(Thomson, 1858)	Belyta	fuscata	Belyta fuscata	Thomson, 1858
diap	292	diap292	Thomson	1858	hemiptera	(Thomson, 1858)	Belyta	hemiptera	Belyta hemiptera	Thomson, 1858
diap	294	diap294	Kieffer	1909	microtoma	(Kieffer, 1909)	Aclista	microtoma	Aclista microtoma	Kieffer, 1909
diap	295	diap295	Thomson	1858	nigra	(Thomson, 1858)	Belyta	nigra	Belyta nigra	Thomson, 1858
diap	297	diap297	Thomson	1858	paralella	(Thomson, 1858)	Belyta	paralella	Belyta paralella	Thomson, 1858
diap	30	diap30	Kieffer	1909	analis	(Kieffer, 1909)	Anectata	analis	Anectata analis	Kieffer, 1909
diap	300	diap300	Kieffer	1909	pubescens	(Kieffer, 1909)	Aclista	pubescens	Aclista pubescens	Kieffer, 1909
diap	302	diap302	Curtis	1831	ruficornis	(Curtis, 1831)	Cinetus	ruficornis	Cinetus ruficornis	Curtis, 1831
diap	305	diap305	Kieffer	1907	soluta	(Kieffer, 1907)	Pantoclis	soluta	Pantoclis soluta	Kieffer, 1907
diap	306	diap306	Kieffer	1908	spinosipes	(Kieffer, 1908)	Aclista	spinosipes	Aclista spinosipes	Kieffer, 1908
diap	307	diap307	Kieffer	1909	striata	(Kieffer, 1909)	Aclista	striata	Aclista striata	Kieffer, 1909
diap	308	diap308	Thomson	1858	subaptera	(Thomson, 1858)	Belyta	subaptera	Belyta subaptera	Thomson, 1858
diap	31	diap31	Kieffer	1909	angusta	(Kieffer, 1909)	Anectata	angusta	Anectata angusta	Kieffer, 1909
diap	314	diap314	Kieffer	1909	variicornis	(Kieffer, 1909)	Aclista	variicornis	Aclista variicornis	Kieffer, 1909
diap	319	diap319	Haliday	1831	armata	(Haliday, 1831)	Cinetus	armata	Cinetus armata	Haliday, 1831
diap	33	diap33	Kieffer	1909	bitensis	(Kieffer, 1909)	Anectata	bitensis	Anectata bitensis	Kieffer, 1909
diap	335	diap335	Haliday	1857	heterocerus	(Haliday, 1857)	Belyta	heterocerus	Belyta heterocerus	Haliday, 1857
diap	34	diap34	Curtis	1831	cantiana	(Curtis, 1831)	Cinetus	cantiana	Cinetus cantiana	Curtis, 1831
diap	340	diap340	Thomson	1858	nervosum	(Thomson, 1858)	Cinetus	nervosum	Cinetus nervosum	Thomson, 1858
diap	359	diap359	Kieffer	1908	apertus	(Kieffer, 1908)	Rhynchopsilus	apertus	Rhynchopsilus apertus	Kieffer, 1908
diap	362	diap362	Haliday	1857	parvulum	(Haliday, 1857)	Belita	parvulum	Belita parvulum	Haliday, 1857
diap	37	diap37	Kieffer	1909	dubia	(Kieffer, 1909)	Anectata	dubia	Anectata dubia	Kieffer, 1909
diap	38	diap38	Thomson	1858	elevata	(Thomson, 1858)	Acoretus	elevata	Acoretus elevata	Thomson, 1858
diap	381	diap381	Thomson	1858	ciliata	(Thomson, 1858)	Belyta	ciliata	Belyta ciliata	Thomson, 1858
diap	400	diap400	Kieffer	1910	giraudi	(Kieffer, 1910)	Prosynacra	giraudi	Prosynacra giraudi	Kieffer, 1910
diap	407	diap407	Nees	1834	brachialis	(Nees, 1834)	Diapria	brachialis	Diapria brachialis	Nees, 1834
diap	41	diap41	Kieffer	1907	filicornis	(Kieffer, 1907)	Pantoclis	filicornis	Pantoclis filicornis	Kieffer, 1907
diap	411	diap411	Kieffer	1910	holconota	(Kieffer, 1910)	Prosynacra	holconota	Prosynacra holconota	Kieffer, 1910
diap	413	diap413	Kieffer	1904	sociabilis	(Kieffer, 1904)	Neuropria	sociabilis	Neuropria sociabilis	Kieffer, 1904
diap	43	diap43	Kieffer	1909	flavicornis	(Kieffer, 1909)	Anectata	flavicornis	Anectata flavicornis	Kieffer, 1909
diap	438	diap438	Kieffer	1911	bifoveatus	(Kieffer, 1911)	Loxotropa	bifoveatus	Loxotropa bifoveatus	Kieffer, 1911
diap	440	diap440	Kieffer	1911	ciliatus	(Kieffer, 1911)	Loxotropa	ciliatus	Loxotropa ciliatus	Kieffer, 1911
diap	442	diap442	Kieffer	1911	crassiceps	(Kieffer, 1911)	Loxotropa	crassiceps	Loxotropa crassiceps	Kieffer, 1911
diap	446	diap446	Marshall	1868	exiguus	(Marshall, 1868)	Loxotropa	exiguus	Loxotropa exiguus	Marshall, 1868
diap	447	diap447	Kieffer	1911	formicarum	(Kieffer, 1911)	Loxotropa	formicarum	Loxotropa formicarum	Kieffer, 1911
diap	45	diap45	Kieffer	1910	fusca	(Kieffer, 1910)	Xenotoma	fusca	Xenotoma fusca	Kieffer, 1910
diap	453	diap453	Kieffer	1911	helicicola	(Kieffer, 1911)	Loxotropa	helicicola	Loxotropa helicicola	Kieffer, 1911
diap	456	diap456	Kieffer	1911	longipennis	(Kieffer, 1911)	Loxotropa	longipennis	Loxotropa longipennis	Kieffer, 1911
diap	457	diap457	Kieffer	1911	luctuosus	(Kieffer, 1911)	Loxotropa	luctuosus	Loxotropa luctuosus	Kieffer, 1911
diap	458	diap458	Kieffer	1911	macroptera	(Kieffer, 1911)	Loxotropa	macroptera	Loxotropa macroptera	Kieffer, 1911
diap	465	diap465	Kieffer	1911	pedisequa	(Kieffer, 1911)	Loxotropa	pedisequa	Loxotropa pedisequa	Kieffer, 1911
diap	467	diap467	Kieffer	1911	rufocinctus	(Kieffer, 1911)	Loxotropa	rufocinctus	Loxotropa rufocinctus	Kieffer, 1911
diap	468	diap468	Kieffer	1911	scoticus	(Kieffer, 1911)	Loxotropa	scoticus	Loxotropa scoticus	Kieffer, 1911
diap	472	diap472	Marshall	1868	tripartitus	(Marshall, 1868)	Loxotropa	tripartitus	Loxotropa tripartitus	Marshall, 1868
diap	48	diap48	Kieffer	1907	fusciventris	(Kieffer, 1907)	Pantoclis	fusciventris	Pantoclis fusciventris	Kieffer, 1907
diap	484	diap484	Fabricius	1775	conica	(Fabricius, 1775)	Ichneumon	conica	Ichneumon conica	Fabricius, 1775
diap	49	diap49	Kieffer	1910	haemorrhoidalis	(Kieffer, 1910)	Xenotoma	haemorrhoidalis	Xenotoma haemorrhoidalis	Kieffer, 1910
diap	493	diap493	Nixon	1980	aphrodite	(Nixon, 1980)	Corynopria	aphrodite	Corynopria aphrodite	Nixon, 1980
		diap494	Haliday	1857	cincta	(Haliday, 1857)	Diapria (Corynopria)	cincta	Diapria (Corynopria) cincta	Haliday, 1857
diap	495	diap495	Thomson	1858	solida	(Thomson, 1858)	Corynopria	solida	Corynopria solida	Thomson, 1858
diap	526	diap526	Thomson	1858	aequata	(Thomson, 1858)	Diapria	aequata	Diapria aequata	Thomson, 1858
diap	53	diap53	Kieffer	1910	marshalli	(Kieffer, 1910)	Xenotoma	marshalli	Xenotoma marshalli	Kieffer, 1910
diap	532	diap532	Thomson	1858	basalis	(Thomson, 1858)	Diapria	basalis	Diapria basalis	Thomson, 1858
diap	535	diap535	Kieffer	1909	cameroni	(Kieffer, 1909)	Phaenopria	cameroni	Phaenopria cameroni	Kieffer, 1909
		diap538	Kieffer	1911	conotoma	(Kieffer, 1911)	Diapria (Tropidopria)	conotoma	Diapria (Tropidopria) conotoma	Kieffer, 1911
diap	54	diap54	Kieffer	1907	neglecta	(Kieffer, 1907)	Pantoclis	neglecta	Pantoclis neglecta	Kieffer, 1907
diap	545	diap545	Walker	1834	fucicola	(Walker, 1834)	Psilus	fucicola	Psilus fucicola	Walker, 1834
diap	548	diap548	Kieffer	1909	halterata	(Kieffer, 1909)	Phaenopria	halterata	Phaenopria halterata	Kieffer, 1909
diap	55	diap55	Kieffer	1907	nigriceps	(Kieffer, 1907)	Xenotoma	nigriceps	Xenotoma nigriceps	Kieffer, 1907
diap	555	diap555	Thomson	1858	hyalinipennis	(Thomson, 1858)	Diapria	hyalinipennis	Diapria hyalinipennis	Thomson, 1858
diap	559	diap559	Jansson	1955	incrassata	(Jansson, 1955)	Phaenopria	incrassata	Phaenopria incrassata	Jansson, 1955
diap	56	diap56	Thomson	1858	pallida	(Thomson, 1858)	Acoretus	pallida	Acoretus pallida	Thomson, 1858
diap	561	diap561	Ratzeburg	1848	modesta	(Ratzeburg, 1848)	Diapria	modesta	Diapria modesta	Ratzeburg, 1848
diap	564	diap564	Thomson	1858	morio	(Thomson, 1858)	Diapria	morio	Diapria morio	Thomson, 1858
diap	565	diap565	Nees	1834	nigra	(Nees, 1834)	Diapria	nigra	Diapria nigra	Nees, 1834
diap	57	diap57	Kieffer	1910	parvula	(Kieffer, 1910)	Xenotoma	parvula	Xenotoma parvula	Kieffer, 1910
diap	573	diap573	Marshall	1868	nigricornis	(Marshall, 1868)	Loxotropa	nigricornis	Loxotropa nigricornis	Marshall, 1868
diap	581	diap581	Thomson	1858	oogaster	(Thomson, 1858)	Diapria	oogaster	Diapria oogaster	Thomson, 1858
diap	587	diap587	Nees	1834	picipes	(Nees, 1834)	Diapria	picipes	Diapria picipes	Nees, 1834
diap	59	diap59	Kieffer	1907	prolongata	(Kieffer, 1907)	Pantoclis	prolongata	Pantoclis prolongata	Kieffer, 1907
diap	597	diap597	Kieffer	1911	subimpressa	(Kieffer, 1911)	Phaenopria	subimpressa	Phaenopria subimpressa	Kieffer, 1911
diap	60	diap60	Kieffer	1907	rufipes	(Kieffer, 1907)	Xenotoma	rufipes	Xenotoma rufipes	Kieffer, 1907
diap	603	diap603	Nees	1834	suspecta	(Nees, 1834)	Diapria	suspecta	Diapria suspecta	Nees, 1834
diap	607	diap607	Thomson	1858	tenuicornis	(Thomson, 1858)	Diapria	tenuicornis	Diapria tenuicornis	Thomson, 1858
diap	608	diap608	Thomson	1858	tritoma	(Thomson, 1858)	Diapria	tritoma	Diapria tritoma	Thomson, 1858
diap	61	diap61	Nees	1834	rufopetiolata	(Nees, 1834)	Belyta	rufopetiolata	Belyta rufopetiolata	Nees, 1834
diap	610	diap610	Latreille	1805	verticillata	(Latreille, 1805)	Diapria	verticillata	Diapria verticillata	Latreille, 1805
diap	616	diap616	Kieffer	1916	marshalli	(Kieffer, 1916)	Ashmeadopria	marshalli	Ashmeadopria marshalli	Kieffer, 1916
diap	618	diap618	Kieffer	1911	myrmecobia	(Kieffer, 1911)	Diapria	myrmecobia	Diapria myrmecobia	Kieffer, 1911
diap	619	diap619	Kieffer	1911	stilata	(Kieffer, 1911)	Diapria	stilata	Diapria stilata	Kieffer, 1911
diap	628	diap628	Schulz	1910	lacustris	(Schulz, 1910)	Ceratopria	lacustris	Ceratopria lacustris	Schulz, 1910
diap	65	diap65	Thomson	1858	scutellaris	(Thomson, 1858)	Acoretus	scutellaris	Acoretus scutellaris	Thomson, 1858
diap	66	diap66	Kieffer	1909	soror	(Kieffer, 1909)	Anectata	soror	Anectata soror	Kieffer, 1909
diap	660	diap660	Kieffer	1910	foersteri	(Kieffer, 1910)	Polypeza	foersteri	Polypeza foersteri	Kieffer, 1910
diap	668	diap668	Jansson	1942	inaequalifrons	(Jansson, 1942)	Galesus	inaequalifrons	Galesus inaequalifrons	Jansson, 1942
diap	67	diap67	Thomson	1858	striolata	(Thomson, 1858)	Acoretus	striolata	Acoretus striolata	Thomson, 1858
diap	679	diap679	Marshall	1867	caecutiens	(Marshall, 1867)	Galesus	caecutiens	Galesus caecutiens	Marshall, 1867
diap	682	diap682	Thomson	1858	frontalis	(Thomson, 1858)	Galesus	frontalis	Galesus frontalis	Thomson, 1858
diap	683	diap683	Curtis	1831	fuscipennis	(Curtis, 1831)	Galesus	fuscipennis	Galesus fuscipennis	Curtis, 1831
		diap688	Kieffer	1911	parvulus	(Kieffer, 1911)	Galesus (Galesus)	parvulus	Galesus (Galesus) parvulus	Kieffer, 1911
diap	689	diap689	Thomson	1858	rufipes	(Thomson, 1858)	Galesus	rufipes	Galesus rufipes	Thomson, 1858
		diap690	Kieffer	1911	submonilis	(Kieffer, 1911)	Galesus (Galesus)	submonilis	Galesus (Galesus) submonilis	Kieffer, 1911
diap	693	diap693	Haliday	1831	claviger	(Haliday, 1831)	Galesus	claviger	Galesus claviger	Haliday, 1831
		diap694	Kieffer	1911	foersteri	(Kieffer, 1911)	Galesus (Galesus)	foersteri	Galesus (Galesus) foersteri	Kieffer, 1911
diap	696	diap696	Kieffer	1906	walkeri	(Kieffer, 1906)	Galesus	walkeri	Galesus walkeri	Kieffer, 1906
		diap711	Kieffer	1911	bipunctata	(Kieffer, 1911)	Hemilexis (Hemilexis)	bipunctata	Hemilexis (Hemilexis) bipunctata	Kieffer, 1911
		diap715	Haliday	1857	perplexa	(Haliday, 1857)	Diapria (Glyphidopria)	perplexa	Diapria (Glyphidopria) perplexa	Haliday, 1857
		diap720	Haliday	1857	platyptera	(Haliday, 1857)	Diapria (Glyphidopria)	platyptera	Diapria (Glyphidopria) platyptera	Haliday, 1857
diap	73	diap73	Thomson	1858	flaviventris	(Thomson, 1858)	Cinetus	flaviventris	Cinetus flaviventris	Thomson, 1858
diap	731	diap731	Haliday	1833	maritima	(Haliday, 1833)	Psilus	maritima	Psilus maritima	Haliday, 1833
diap	744	diap744	Nees	1834	nervosus	(Nees, 1834)	Diapria	nervosus	Diapria nervosus	Nees, 1834
diap	751	diap751	Fonscolombe	1832	rufipes	(Fonscolombe, 1832)	Teleas	rufipes	Teleas rufipes	Fonscolombe, 1832
diap	80	diap80	Kieffer	1907	sciarivora	(Kieffer, 1907)	Zelotypa	sciarivora	Zelotypa sciarivora	Kieffer, 1907
diap	823	diap823	Haliday	1831	dorsiger	(Haliday, 1831)	Cinetus	dorsiger	Cinetus dorsiger	Haliday, 1831
diap	826	diap826	Thomson	1859	flavicornis	(Thomson, 1859)	Entomius	flavicornis	Entomius flavicornis	Thomson, 1859
platy	102	platy102	Kirby	1800	inserens	(Kirby, 1800)	Ichneumon	inserens	Ichneumon inserens	Kirby, 1800
platy	103	platy103	Nees	1834	punctiger	(Nees, 1834)	Platygaster	punctiger	Platygaster punctiger	Nees, 1834
platy	113	platy113	Walker	1835	halia	(Walker, 1835)	Platygaster	halia	Platygaster halia	Walker, 1835
platy	114	platy114	Walker	1835	laodice	(Walker, 1835)	MISSING FROM WORD	laodice	MISSING FROM WORD laodice	Walker, 1835
platy	117	platy117	Walker	1835	nice	(Walker, 1835)	Platygaster	nice	Platygaster nice	Walker, 1835
platy	118	platy118	Walker	1835	nydia	(Walker, 1835)	Platygaster	nydia	Platygaster nydia	Walker, 1835
platy	120	platy120	Debauche	1947	orchymonti	(Debauche, 1947)	Anacoryphe	orchymonti	Anacoryphe orchymonti	Debauche, 1947
platy	122	platy122	Walker	1835	ozines	(Walker, 1835)	Platygaster	ozines	Platygaster ozines	Walker, 1835
platy	123	platy123	Kirby	1798	tipulae	(Kirby, 1798)	Ichneumon	tipulae	Ichneumon tipulae	Kirby, 1798
platy	125	platy125	Kieffer	1913	tripartita	(Kieffer, 1913)	Amblyaspis	tripartita	Amblyaspis tripartita	Kieffer, 1913
platy	13	platy13	Walker	1838	boter	(Walker, 1838)	Inostemma	boter	Inostemma boter	Walker, 1838
platy	130	platy130	Haliday	1835	areolata	(Haliday, 1835)	Inostemma	areolata	Inostemma areolata	Haliday, 1835
platy	132	platy132	Walker	1838	ocalea	(Walker, 1838)	Inostemma	ocalea	Inostemma ocalea	Walker, 1838
platy	137	platy137	Kieffer	1916	lasiopterae	(Kieffer, 1916)	Disynopeas	lasiopterae	Disynopeas lasiopterae	Kieffer, 1916
platy	14	platy14	Kieffer	1913	humilis	(Kieffer, 1913)	Acerota	humilis	Acerota humilis	Kieffer, 1913
platy	141	platy141	Walker	1835	catillus	(Walker, 1835)	Platygaster	catillus	Platygaster catillus	Walker, 1835
platy	143	platy143	Walker	1835	mamertes	(Walker, 1835)	Platygaster	mamertes	Platygaster mamertes	Walker, 1835
platy	144	platy144	Walker	1835	seron	(Walker, 1835)	Platygaster	seron	Platygaster seron	Walker, 1835
platy	17	platy17	Walker	1835	abas	(Walker, 1835)	Platygaster	abas	Platygaster abas	Walker, 1835
platy	176	platy176	Kieffer	1916	betulae	(Kieffer, 1916)	Misocyclops	betulae	Misocyclops betulae	Kieffer, 1916
platy	18	platy18	Walker	1835	belus	(Walker, 1835)	Platygaster	belus	Platygaster belus	Walker, 1835
platy	19	platy19	Walker	1835	crates	(Walker, 1835)	Platygaster	crates	Platygaster crates	Walker, 1835
platy	20	platy20	Walker	1835	nereus	(Walker, 1835)	Platygaster	nereus	Platygaster nereus	Walker, 1835
platy	205	platy205	Kieffer	1913	enneatoma	(Kieffer, 1913)	Epimeces	enneatoma	Epimeces enneatoma	Kieffer, 1913
platy	207	platy207	Westwood	1833	ensifer	(Westwood, 1833)	Epimeces	ensifer	Epimeces ensifer	Westwood, 1833
platy	21	platy21	Walker	1835	otreus	(Walker, 1835)	Platygaster	otreus	Platygaster otreus	Walker, 1835
platy	212	platy212	Kieffer	1916	floricola	(Kieffer, 1916)	Prosactogaster	floricola	Prosactogaster floricola	Kieffer, 1916
platy	22	platy22	Walker	1835	prorsa	(Walker, 1835)	Platygaster	prorsa	Platygaster prorsa	Walker, 1835
platy	23	platy23	Haliday	1835	roboris	(Haliday, 1835)	Platygaster	roboris	Platygaster roboris	Haliday, 1835
platy	235	platy235	Kieffer	1916	?leucanthemi	(Kieffer, 1916)	Misocyclops	?leucanthemi	Misocyclops ?leucanthemi	Kieffer, 1916
platy	250	platy250	Kieffer	1916	marshalli	(Kieffer, 1916)	Prosactogaster	marshalli	Prosactogaster marshalli	Kieffer, 1916
platy	280	platy280	Schrank	1781	phragmitis	(Schrank, 1781)	Cynips	phragmitis	Cynips phragmitis	Schrank, 1781
platy	289	platy289	Kieffer	1916	quadrifaria	(Kieffer, 1916)	Polygnotus	quadrifaria	Polygnotus quadrifaria	Kieffer, 1916
platy	29	platy29	Haliday	1835	scelionoides	(Haliday, 1835)	Platygaster	scelionoides	Platygaster scelionoides	Haliday, 1835
platy	295	platy295	Förster	1861	signata	(Förster, 1861)	Polygnotus	signata	Polygnotus signata	Förster, 1861
platy	308	platy308	Kieffer	1926	subuliformis	(Kieffer, 1926)	Prosactogaster	subuliformis	Prosactogaster subuliformis	Kieffer, 1926
platy	311	platy311	Kieffer	1926	suecica	(Kieffer, 1926)	MISSING FROM WORD	suecica	MISSING FROM WORD suecica	Kieffer, 1926
platy	33	platy33	Walker	1835	tritici	(Walker, 1835)	Platygaster	tritici	Platygaster tritici	Walker, 1835
platy	34	platy34	Walker	1835	vestina	(Walker, 1835)	Platygaster	vestina	Platygaster vestina	Walker, 1835
platy	343	platy343	Walker	1835	craterus	(Walker, 1835)	Platygaster	craterus	Platygaster craterus	Walker, 1835
platy	346	platy346	Förster	1856	curvicauda	(Förster, 1856)	Sactogaster	curvicauda	Sactogaster curvicauda	Förster, 1856
platy	351	platy351	Walker	1835	euryale	(Walker, 1835)	Platygaster	euryale	Platygaster euryale	Walker, 1835
platy	357	platy357	Walker	1835	hyllus	(Walker, 1835)	Platygaster	hyllus	Platygaster hyllus	Walker, 1835
platy	360	platy360	Walker	1835	jasius	(Walker, 1835)	Platygaster	jasius	Platygaster jasius	Walker, 1835
platy	361	platy361	Walker	1835	larides	(Walker, 1835)	Platygaster	larides	Platygaster larides	Walker, 1835
platy	366	platy366	Walker	1835	myles	(Walker, 1835)	Platygaster	myles	Platygaster myles	Walker, 1835
platy	370	platy370	Walker	1835	osaces	(Walker, 1835)	Platygaster	osaces	Platygaster osaces	Walker, 1835
platy	371	platy371	Walker	1835	rhanis	(Walker, 1835)	Platygaster	rhanis	Platygaster rhanis	Walker, 1835
platy	375	platy375	Walker	1835	sosis	(Walker, 1835)	Platygaster	sosis	Platygaster sosis	Walker, 1835
platy	377	platy377	Walker	1835	tarsa	(Walker, 1835)	Platygaster	tarsa	Platygaster tarsa	Walker, 1835
platy	378	platy378	Walker	1835	trebius	(Walker, 1835)	Platygaster	trebius	Platygaster trebius	Walker, 1835
platy	379	platy379	Walker	1835	velutinum	(Walker, 1835)	Platygaster	velutinum	Platygaster velutinum	Walker, 1835
platy	380	platy380	Westwood	1833	ventrale	(Westwood, 1833)	Epimeces	ventrale	Epimeces ventrale	Westwood, 1833
platy	385	platy385	Walker	1835	didas	(Walker, 1835)	Platygaster	didas	Platygaster didas	Walker, 1835
platy	386	platy386	Walker	1835	pisis	(Walker, 1835)	Platygaster	pisis	Platygaster pisis	Walker, 1835
platy	388	platy388	Walker	1835	remulus	(Walker, 1835)	Platygaster	remulus	Platygaster remulus	Walker, 1835
platy	395	platy395	Walker	1836	aethra	(Walker, 1836)	Telenomus	aethra	Telenomus aethra	Walker, 1836
platy	396	platy396	Walker	1836	asramanes	(Walker, 1836)	Trimorus	asramanes	Trimorus asramanes	Walker, 1836
platy	412	platy412	Kieffer	1913	hospes	(Kieffer, 1913)	Plesiobaeus	hospes	Plesiobaeus hospes	Kieffer, 1913
platy	43	platy43	Walker	1835	cochleata	(Walker, 1835)	Platygaster	cochleata	Platygaster cochleata	Walker, 1835
platy	439	platy439	Kieffer	1908	bicolor	(Kieffer, 1908)	Anteris	bicolor	Anteris bicolor	Kieffer, 1908
platy	467	platy467	Marchal	1901	gerriphagus	(Marchal, 1901)	Limnodytes	gerriphagus	Limnodytes gerriphagus	Marchal, 1901
platy	47	platy47	Haliday	1835	laricis	(Haliday, 1835)	Platygaster	laricis	Platygaster laricis	Haliday, 1835
platy	476	platy476	Walker	1838	europus	(Walker, 1838)	Inostemma	europus	Inostemma europus	Walker, 1838
platy	477	platy477	Walker	1836	mecrida	(Walker, 1836)	Inostemma	mecrida	Inostemma mecrida	Walker, 1836
platy	482	platy482	Förster	1878	longicornis	(Förster, 1878)	Zacrita	longicornis	Zacrita longicornis	Förster, 1878
platy	495	platy495	Thomson	1859	transversus	(Thomson, 1859)	Anopedias	transversus	Anopedias transversus	Thomson, 1859
platy	503	platy503	Latreille	1805	clavicornis	(Latreille, 1805)	Scelio	clavicornis	Scelio clavicornis	Latreille, 1805
platy	521	platy521	Walker	1836	aegle	(Walker, 1836)	Teleas	aegle	Teleas aegle	Walker, 1836
platy	522	platy522	Kieffer	1911	algicola	(Kieffer, 1911)	Paragryon	algicola	Paragryon algicola	Kieffer, 1911
platy	523	platy523	Kieffer	1908	angustipennis	(Kieffer, 1908)	Hoplogryon	angustipennis	Hoplogryon angustipennis	Kieffer, 1908
platy	524	platy524	Kieffer	1908	antennalis	(Kieffer, 1908)	Hoplogryon	antennalis	Hoplogryon antennalis	Kieffer, 1908
platy	525	platy525	Walker	1836	apricans	(Walker, 1836)	Teleas	apricans	Teleas apricans	Walker, 1836
platy	526	platy526	Walker	1836	aratus	(Walker, 1836)	Teleas	aratus	Teleas aratus	Walker, 1836
platy	527	platy527	Kieffer	1908	bacilliger	(Kieffer, 1908)	Hoplogryon	bacilliger	Hoplogryon bacilliger	Kieffer, 1908
platy	528	platy528	Walker	1836	bassus	(Walker, 1836)	Teleas	bassus	Teleas bassus	Walker, 1836
platy	529	platy529	Thomson	1859	brevicollis	(Thomson, 1859)	Prosacantha	brevicollis	Prosacantha brevicollis	Thomson, 1859
platy	530	platy530	Kieffer	1908	cameroni	(Kieffer, 1908)	Hoplogryon	cameroni	Hoplogryon cameroni	Kieffer, 1908
platy	531	platy531	Kieffer	1908	carinatus	(Kieffer, 1908)	Hoplogryon	carinatus	Hoplogryon carinatus	Kieffer, 1908
platy	532	platy532	Kieffer	1908	carinifrons	(Kieffer, 1908)	Hoplogryon	carinifrons	Hoplogryon carinifrons	Kieffer, 1908
platy	533	platy533	Walker	1836	cephisus	(Walker, 1836)	Teleas	cephisus	Teleas cephisus	Walker, 1836
platy	534	platy534	Walker	1836	chesias	(Walker, 1836)	Teleas	chesias	Teleas chesias	Walker, 1836
platy	535	platy535	Walker	1836	chyllene	(Walker, 1836)	Teleas	chyllene	Teleas chyllene	Walker, 1836
platy	536	platy536	Walker	1836	elatior	(Walker, 1836)	Teleas	elatior	Teleas elatior	Walker, 1836
platy	537	platy537	Kieffer	1908	elongatus	(Kieffer, 1908)	Hoplogryon	elongatus	Hoplogryon elongatus	Kieffer, 1908
platy	538	platy538	Walker	1836	ephippium	(Walker, 1836)	Teleas	ephippium	Teleas ephippium	Walker, 1836
platy	539	platy539	Walker	1836	flavipes	(Walker, 1836)	Teleas	flavipes	Teleas flavipes	Walker, 1836
platy	54	platy54	Fitch	1861	error	(Fitch, 1861)	Platygaster	error	Platygaster error	Fitch, 1861
platy	549	platy549	Walker	1836	galba	(Walker, 1836)	Teleas	galba	Teleas galba	Walker, 1836
platy	550	platy550	Walker	1836	glaucus	(Walker, 1836)	Teleas	glaucus	Teleas glaucus	Walker, 1836
platy	551	platy551	Kieffer	1912	halteratus	(Kieffer, 1912)	Hoplogryon	halteratus	Hoplogryon halteratus	Kieffer, 1912
platy	552	platy552	Walker	1836	lamus	(Walker, 1836)	Teleas	lamus	Teleas lamus	Walker, 1836
platy	553	platy553	Kieffer	1908	levigena	(Kieffer, 1908)	Hoplogryon	levigena	Hoplogryon levigena	Kieffer, 1908
platy	554	platy554	Walker	1836	lycaon	(Walker, 1836)	Teleas	lycaon	Teleas lycaon	Walker, 1836
platy	555	platy555	Kieffer	1913	marshalli	(Kieffer, 1913)	Hoplogryon	marshalli	Hoplogryon marshalli	Kieffer, 1913
platy	556	platy556	Kieffer	1908	micropterus	(Kieffer, 1908)	Hoplogryon	micropterus	Hoplogryon micropterus	Kieffer, 1908
platy	557	platy557	Kieffer	1911	myrmecobius	(Kieffer, 1911)	Hoplogryon	myrmecobius	Hoplogryon myrmecobius	Kieffer, 1911
platy	558	platy558	Kieffer	1911	myrmecophilus	(Kieffer, 1911)	Paragryon	myrmecophilus	Paragryon myrmecophilus	Kieffer, 1911
platy	559	platy559	Walker	1836	nanno	(Walker, 1836)	Gryon	nanno	Gryon nanno	Walker, 1836
platy	560	platy560	Thomson	1859	nitidulus	(Thomson, 1859)	Prosacantha	nitidulus	Prosacantha nitidulus	Thomson, 1859
platy	566	platy566	Walker	1836	ocyroe	(Walker, 1836)	Teleas	ocyroe	Teleas ocyroe	Walker, 1836
platy	567	platy567	Thomson	1859	opacus	(Thomson, 1859)	Prosacantha	opacus	Prosacantha opacus	Thomson, 1859
platy	569	platy569	Thomson	1859	ovatus	(Thomson, 1859)	Prosacantha	ovatus	Prosacantha ovatus	Thomson, 1859
platy	573	platy573	Walker	1836	paula	(Walker, 1836)	Teleas	paula	Teleas paula	Walker, 1836
platy	574	platy574	Walker	1836	procris	(Walker, 1836)	Teleas	procris	Teleas procris	Walker, 1836
platy	575	platy575	Kieffer	1908	punctatifrons	(Kieffer, 1908)	Hoplogryon	punctatifrons	Hoplogryon punctatifrons	Kieffer, 1908
platy	576	platy576	Thomson	1859	puncticollis	(Thomson, 1859)	Prosacantha	puncticollis	Prosacantha puncticollis	Thomson, 1859
platy	579	platy579	Kieffer	1908	rufonotatus	(Kieffer, 1908)	Hoplogryon	rufonotatus	Hoplogryon rufonotatus	Kieffer, 1908
platy	580	platy580	Kieffer	1908	sectigena	(Kieffer, 1908)	Hoplogryon	sectigena	Hoplogryon sectigena	Kieffer, 1908
platy	581	platy581	Kieffer	1908	striatigena	(Kieffer, 1908)	Hoplogryon	striatigena	Hoplogryon striatigena	Kieffer, 1908
platy	582	platy582	Walker	1836	therycides	(Walker, 1836)	Teleas	therycides	Teleas therycides	Walker, 1836
platy	593	platy593	Walker	1836	timareta	(Walker, 1836)	Teleas	timareta	Teleas timareta	Walker, 1836
platy	594	platy594	Kieffer	1908	tuberculatus	(Kieffer, 1908)	Hoplogryon	tuberculatus	Hoplogryon tuberculatus	Kieffer, 1908
platy	595	platy595	Walker	1836	varicornis	(Walker, 1836)	Teleas	varicornis	Teleas varicornis	Walker, 1836
platy	601	platy601	Walker	1836	xenetus	(Walker, 1836)	Teleas	xenetus	Teleas xenetus	Walker, 1836
platy	643	platy643	Ratzeburg	1844	dalmanni	(Ratzeburg, 1844)	Teleas	dalmanni	Teleas dalmanni	Ratzeburg, 1844
platy	646	platy646	Szelényi	1939	danubialis	(Szelényi, 1939)	Platytelenomus	danubialis	Platytelenomus danubialis	Szelényi, 1939
platy	659	platy659	Ratzeburg	1844	laeviusculus	(Ratzeburg, 1844)	Teleas	laeviusculus	Teleas laeviusculus	Ratzeburg, 1844
platy	663	platy663	Westwood	1833	minutus	(Westwood, 1833)	Hemisius	minutus	Hemisius minutus	Westwood, 1833
platy	665	platy665	Thomson	1861	nitidulus	(Thomson, 1861)	Phanurus	nitidulus	Phanurus nitidulus	Thomson, 1861
platy	67	platy67	Jurine	1807	boscii	(Jurine, 1807)	Psilus	boscii	Psilus boscii	Jurine, 1807
platy	671	platy671	Nees	1834	phalaenarum	(Nees, 1834)	Teleas	phalaenarum	Teleas phalaenarum	Nees, 1834
platy	674	platy674	Ratzeburg	1844	punctatissimus	(Ratzeburg, 1844)	Teleas	punctatissimus	Teleas punctatissimus	Ratzeburg, 1844
platy	677	platy677	Thomson	1861	tetratomus	(Thomson, 1861)	Phanurus	tetratomus	Phanurus tetratomus	Thomson, 1861
platy	683	platy683	Nees	1834	truncatus	(Nees, 1834)	Teleas	truncatus	Teleas truncatus	Nees, 1834
platy	697	platy697	Walker	1838	arminon	(Walker, 1838)	Telenomus	arminon	Telenomus arminon	Walker, 1838
platy	698	platy698	Walker	1836	belenus	(Walker, 1836)	Telenomus	belenus	Telenomus belenus	Walker, 1836
platy	699	platy699	Javahery	1968	davatchii	(Javahery, 1968)	Asolcus	davatchii	Asolcus davatchii	Javahery, 1968
platy	700	platy700	Thomson	1860	flavipes	(Thomson, 1860)	Telenomus	flavipes	Telenomus flavipes	Thomson, 1860
platy	701	platy701	Thomson	1861	grandis	(Thomson, 1861)	Telenomus	grandis	Telenomus grandis	Thomson, 1861
platy	707	platy707	Walker	1838	theste	(Walker, 1838)	Telenomus	theste	Telenomus theste	Walker, 1838
platy	708	platy708	Javahery	1968	waloffae	(Javahery, 1968)	Asolcus	waloffae	Asolcus waloffae	Javahery, 1968
platy	712	platy712	Walker	1836	laricis	(Walker, 1836)	Telenomus	laricis	Telenomus laricis	Walker, 1836
platy	90	platy90	Walker	1835	cotta	(Walker, 1835)	Platygaster	cotta	Platygaster cotta	Walker, 1835
platy	91	platy91	Walker	1835	erato	(Walker, 1835)	Platygaster	erato	Platygaster erato	Walker, 1835
platy	92	platy92	Nees	1834	grandis	(Nees, 1834)	Platygaster	grandis	Platygaster grandis	Nees, 1834
platy	94	platy94	Walker	1835	matuta	(Walker, 1835)	Platygaster	matuta	Platygaster matuta	Walker, 1835
procto	104	procto104	Haliday	1839	brevicornis	(Haliday, 1839)	Proctotrupes	brevicornis	Proctotrupes brevicornis	Haliday, 1839
procto	11	procto11	Panzer	1798	anomalipes	(Panzer, 1798)	Sphex	anomalipes	Sphex anomalipes	Panzer, 1798
procto	111	procto111	Stelfox	1950	arcuator	(Stelfox, 1950)	Cryptoserphus	arcuator	Cryptoserphus arcuator	Stelfox, 1950
procto	115	procto115	Haliday	1839	apterogynus	(Haliday, 1839)	Proctotrupes	apterogynus	Proctotrupes apterogynus	Haliday, 1839
procto	121	procto121	Haliday	1839	elongatus	(Haliday, 1839)	Proctotrupes	elongatus	Proctotrupes elongatus	Haliday, 1839
procto	126	procto126	Morley	1922	chittii	(Morley, 1922)	Proctotrypes	chittii	Proctotrypes chittii	Morley, 1922
procto	128	procto128	Haliday	1839	fuscipes	(Haliday, 1839)	Proctotrupes	fuscipes	Proctotrupes fuscipes	Haliday, 1839
procto	130	procto130	Jurine	1807	pallipes	(Jurine, 1807)	Codrus	pallipes	Codrus pallipes	Jurine, 1807
procto	133	procto133	Haliday	1839	viator	(Haliday, 1839)	Proctotrupes	viator	Proctotrupes viator	Haliday, 1839
procto	139	procto139	Haliday	1839	calcar	(Haliday, 1839)	Proctotrupes	calcar	Proctotrupes calcar	Haliday, 1839
procto	152	procto152	Schrank	1780	brachypterus	(Schrank, 1780)	Serphus	brachypterus	Serphus brachypterus	Schrank, 1780
procto	163	procto163	Linnaeus	1758	gravidator	(Linnaeus, 1758)	Ichneumon	gravidator	Ichneumon gravidator	Linnaeus, 1758
procto	171	procto171	Haliday	1839	laricis	(Haliday, 1839)	Proctotrupes	laricis	Proctotrupes laricis	Haliday, 1839
procto	174	procto174	Nixon	1942	perkinsi	(Nixon, 1942)	Cryptoserphus	perkinsi	Cryptoserphus perkinsi	Nixon, 1942
procto	177	procto177	Möller	1882	[foveolatus	(Möller, 1882)	Proctotrupes	[foveolatus	Proctotrupes [foveolatus	Möller, 1882
procto	26	procto26	Nees	1834	parvulus	(Nees, 1834)	Codrus	parvulus	Codrus parvulus	Nees, 1834
procto	30	procto30	Förster	1856	picicornis	(Förster, 1856)	Disogmus	picicornis	Disogmus picicornis	Förster, 1856
procto	36	procto36	Haliday	1839	aculeator	(Haliday, 1839)	Proctotrupes	aculeator	Proctotrupes aculeator	Haliday, 1839
procto	41	procto41	Provancher	1881	flavipes	(Provancher, 1881)	Proctotrupes	flavipes	Proctotrupes flavipes	Provancher, 1881
procto	46	procto46	Thomson	1858	longitarsis	(Thomson, 1858)	Proctotrupes	longitarsis	Proctotrupes longitarsis	Thomson, 1858
procto	49	procto49	Haliday	1839	areolator	(Haliday, 1839)	Proctotrupes	areolator	Proctotrupes areolator	Haliday, 1839
procto	59	procto59	Thomson	1858	basalis	(Thomson, 1858)	Proctotrupes	basalis	Proctotrupes basalis	Thomson, 1858
procto	64	procto64	Gravenhorst	1807	ater	(Gravenhorst, 1807)	Codrus	ater	Codrus ater	Gravenhorst, 1807
procto	72	procto72	Nees	1834	crenicornis	(Nees, 1834)	Codrus	crenicornis	Codrus crenicornis	Nees, 1834
procto	77	procto77	Nees	1834	ligatus	(Nees, 1834)	Codrus	ligatus	Codrus ligatus	Nees, 1834
procto	78	procto78	Nees	1834	longicornis	(Nees, 1834)	Codrus	longicornis	Codrus longicornis	Nees, 1834
procto	87	procto87	Ashmead	1893	quadriceps	(Ashmead, 1893)	Proctotrypes	quadriceps	Proctotrypes quadriceps	Ashmead, 1893
										,
